## Dissection of the ATPase active site of McdA reveals the sequential steps essential for carboxysome distribution

Pusparanee Hakim<sup>1</sup> and Anthony G. Vecchiarelli<sup>1\*</sup>

Department of Molecular, Cellular, and Developmental Biology, University of Michigan, Ann Arbor, MI, USA.

**\*Corresponding Author Email Address:** ave@umich.edu

**Running Title:** McdA ATP-cycle distributes carboxysomes

### Abbreviations:

BMC – Bacterial Microcompartment  
mNG – monomeric NeonGreen  
mTQ – monomeric Turquoise2  
McdA – Maintenance of Carboxysome Distribution protein A  
McdB – Maintenance of Carboxysome Distribution protein B  
ParA – Partition protein A  
ParB – Partition protein B  
ATP – Adenosine triphosphate  
AMPPNP – Adenylyl-imidodiphosphate  
nsDNA – non-specific DNA  
DAPI – 4',6-diamidino-2-phenylindole

### Keywords:

Cyanobacteria, ParA ATPase, McdB, Subcellular Organization

1 **ABSTRACT**

2 Carboxysomes, the most prevalent and well-studied anabolic bacterial microcompartment, play a central  
3 role in efficient carbon fixation by cyanobacteria and proteobacteria. In previous studies, we identified the  
4 two-component system called McdAB that spatially distributes carboxysomes across the bacterial  
5 nucleoid. McdA, a ParA-like ATPase, forms a dynamic oscillating gradient on the nucleoid in response to  
6 carboxysome-localized McdB. As McdB stimulates McdA ATPase activity, McdA is removed from the  
7 nucleoid in the vicinity of carboxysomes, propelling these proteinaceous cargos toward regions of highest  
8 McdA concentration via a Brownian-ratchet mechanism. However, how the ATPase cycle of McdA  
9 governs its *in vivo* dynamics and carboxysome positioning remains unresolved. Here, by strategically  
10 introducing amino acid substitutions in the ATP-binding region of McdA, we sequentially trap McdA at  
11 specific steps in its ATP cycle. We map out critical events in the ATPase cycle of McdA that allows the  
12 protein to bind ATP, dimerize, change its conformation into a DNA-binding state, interact with McdB-  
13 bound carboxysomes, hydrolyze ATP and release from the nucleoid. We also find that McdA is a member  
14 of a previously unstudied subset of ParA family ATPases, harboring unique interactions with ATP and  
15 the nucleoid for trafficking their cognate intracellular cargos.

16

17

18

19

20

21

22

23

24

25

## 26 INTRODUCTION

27 The ParA family of ATPases play major roles in the subcellular organization of bacterial cells, with  
28 members involved in the positioning of a wide array of intracellular cargos including plasmids,  
29 chromosomes, the divisome, flagella, chemotaxis clusters, and carbon-fixing organelles called  
30 carboxysomes (Lutkenhaus, 2012; Vecchiarelli *et al.*, 2012; Kiekebusch and Thanbichler, 2014). How  
31 ATP is used to organize such a diversity of genetic and proteinaceous cargos remains unclear. ParA  
32 family members are defined by the presence of a deviant Walker A motif, along with Walker A' and  
33 Walker B motifs (Koonin, 1993). Aside from these motifs that make up the ATP-binding pocket, few  
34 similarities exist at the sequence level. But structurally, all ParA family members solved to date form very  
35 similar nucleotide-sandwich dimers (Schumacher *et al.*, 2012, 2019; Zhang and Schumacher, 2017). ATP  
36 binding stabilizes dimerization because of an invariant “signature” lysine residue that defines the deviant  
37 Walker A box, which makes cross-contacts with the  $\gamma$ -phosphate of the opposing monomer making up the  
38 sandwich dimer (Dunham *et al.*, 2009).

39 The ParA family is named after its best-studied member. The ParA ATPase is part of tripartite DNA  
40 segregation system that partitions and positions replicated copies of chromosomes and low-copy plasmids  
41 to opposite cell halves, thus ensuring faithful inheritance of these genetic cargos after cell division (Baxter  
42 and Funnell, 2014; Badrinarayanan *et al.*, 2015; Jalal and Le, 2020). Cytoplasmic ParA monomers bind  
43 ATP and form the ATP-sandwich dimer (Davey and Funnell, 1997; Zhang and Schumacher, 2017). The  
44 ParA dimer then undergoes an ATP-specific conformational change that licenses binding to nonspecific  
45 DNA *in vitro*, which equates to binding the bacterial nucleoid *in vivo* (Hester and Lutkenhaus, 2007;  
46 Castaing *et al.*, 2008; Vecchiarelli *et al.*, 2010). In its DNA-binding form, ParA can robustly interact with  
47 its partner protein, ParB (Pratto *et al.*, 2008). ParB dimers site-specifically load onto the plasmid, or  
48 chromosome, to be partitioned via specific binding to a centromere-like site, typically called *parS* (Baxter  
49 and Funnell, 2014; Jalal and Le, 2020). ParB dimers spread from *parS* onto flanking DNA to form a  
50 massive multimeric nucleoprotein complex (Sanchez *et al.*, 2015; Funnell, 2016). This ParB-*parS*  
51 complex can interact with ParA dimers and stimulate its ATPase activity, which is coupled to ParA

52 release from the nucleoid (Hwang *et al.*, 2013; Vecchiarelli *et al.*, 2013; Volante and Alonso, 2015). The  
53 resulting ParA depletion zone that forms around the ParB-*parS* complex also provides a ParA  
54 concentration gradient on the nucleoid. In this Brownian-ratchet mechanism, ParB-*parS* complexes on  
55 newly replicated chromosomes or plasmids are bidirectionally segregated to opposing cell-halves as they  
56 chase higher concentrations of ParA along the nucleoid in opposing directions (Vecchiarelli *et al.*, 2010,  
57 2014).

58 A growing list of protein-based cargos have been shown to also require a ParA-type ATPase for their  
59 subcellular organization, including carboxysomes (Lutkenhaus, 2012; Vecchiarelli *et al.*, 2012).

60 Carboxysomes are carbon-fixing organelles found in all cyanobacteria and most carbon-fixing  
61 proteobacteria (Turmo *et al.*, 2017), and are responsible for roughly a third of global carbon fixation  
62 (Cohen and Gurevitz, 2006). By encapsulating the enzymes Ribulose-1,5-bisphosphate  
63 carboxylase/oxygenase (Rubisco) and carbonic anhydrase in a selectively permeable protein shell, the  
64 resulting CO<sub>2</sub>-rich microenvironment within carboxysomes ensures that carboxylation of ribulose-1,5-  
65 bisphosphate is favored over the undesired process of photorespiration where O<sub>2</sub> is fixed instead of CO<sub>2</sub>  
66 (Kerfeld *et al.*, 2018). Despite the importance of carboxysomes to the global carbon cycle, the  
67 mechanisms underlying their subcellular organization remains unclear.

68 In 2010, Savage and colleagues showed that a ParA-like ATPase, now termed Maintenance of  
69 carboxysome distribution protein A (McdA), was required for the equidistant positioning of  
70 carboxysomes down the length of the rod-shaped cyanobacterium *Synechococcus elongatus* PCC7942  
71 (henceforth *S. elongatus*) (Savage *et al.*, 2010). More recently, we found that McdA functions with a  
72 partner protein, called McdB, which associates with the carboxysome cargo and is required for the  
73 dynamic oscillatory behavior of McdA *in vivo* (MacCready *et al.*, 2018). ATP-bound McdA has non-  
74 specific DNA binding activity and McdB stimulates McdA ATPase activity as well as its release from a  
75 non-specific DNA substrate *in vitro*. From these biochemical findings, we proposed that McdB-bound  
76 carboxysomes locally stimulate the release of McdA from the nucleoid, and the resulting McdA gradients  
77 are then used to drive the movement and equidistant positioning of carboxysomes across the nucleoid

78 region of the cell; akin to DNA partitioning by ParABS systems. However, it remains to be determined  
79 how the ATP cycle of McdA governs the molecular events required for its dynamic oscillatory patterning  
80 and the positioning of McdB-bound carboxysomes across the nucleoid.

81 There are notable differences that set *S. elongatus* McdA apart from classical ParA family ATPases.  
82 For example, the signature lysine residue that defines the ParA family is absent in the deviant Walker A  
83 box of McdA. Also intriguing was the finding that McdA possesses a substantially higher ATPase activity  
84 compared to ParA ATPases involved in DNA partitioning (Ah-Seng *et al.*, 2009; Vecchiarelli *et al.*, 2010;  
85 MacCready *et al.*, 2018). These differences drove us to dissect the molecular events of carboxysome  
86 positioning by McdA and identify how these steps are coupled to its ATP cycle.

87 Despite these differences, it was recently shown that an McdA homolog shares the adenine-nucleotide  
88 sandwich dimer structure solved for several other ParA family ATPases (Schumacher *et al.*, 2019)  
89 (Figure 1A). Additionally, many of the invariant amino acids critical for ATP-dependent functions are  
90 also found in McdA; with the exception of the signature lysine residue in the Walker A box (Figure 1B).  
91 To dissect how ATP-binding and hydrolysis mediates McdA function in carboxysome positioning, we  
92 introduced strategic amino acid substitutions in the ATP-binding pocket of McdA. The mutations are  
93 synonymous with “trap” mutants made in several well-studied ParA family members involved in the  
94 positioning of plasmids (Fung *et al.*, 2001; Libante *et al.*, 2001; Barillà *et al.*, 2005; Vecchiarelli *et al.*,  
95 2010, 2013), chromosomes (Leonard *et al.*, 2005), the divisome (Lutkenhaus and Sundaramoorthy, 2003;  
96 Kiekebusch *et al.*, 2012; Schumacher *et al.*, 2017), flagella (Ono *et al.*, 2015; Schuhmacher *et al.*, 2015),  
97 and chemotaxis clusters (Roberts *et al.*, 2012; Ringgaard *et al.*, 2014) (Summary in Figure 1C, detailed  
98 in Table S1). The data presented in this study connects key steps in the ATP cycle of McdA to the  
99 stepwise events required for distributing McdB-bound carboxysomes across the cyanobacterial nucleoid.

100

101

102

103

104 **RESULTS:**

105 **Strategy for trapping and imaging McdA at specific steps of its ATPase cycle**

106 We performed *in vivo* fluorescence microscopy to determine how McdA dynamics and carboxysome  
107 organization were altered for McdA mutants trapped at specific steps of its ATP cycle. To visualize  
108 carboxysomes, the fluorescent protein monomeric Turquoise2 (mTQ) was fused to the C-terminus of the  
109 small subunit of the Rubisco enzyme (RbcS) yielding RbcS-mTQ. RbcS-mTQ was expressed using a  
110 second copy of its native promoter (inserted at neutral site 1) in addition to wild-type *rbcS* at its native  
111 locus. To simultaneously image the McdA trap mutants in our carboxysome reporter strain, the amino  
112 acid substitutions were made in the ATP-binding pocket of an McdA variant that was N-terminally fused  
113 to the fluorescent protein monomeric NeonGreen (mNG) (Shaner *et al.*, 2013). We have previously  
114 shown that mNG-McdA is fully functional for carboxysome positioning when expressed as the only copy  
115 of McdA at its native locus (MacCready *et al.*, 2018). Finally, we also performed Phase Contrast imaging  
116 to monitor for changes in cell morphology, as we have recently shown that carboxysome mispositioning  
117 in *mcdA* or *mcdB* deletion strains triggers cell elongation, which we proposed is a response to carbon  
118 limitation (Rillema *et al.*, 2020).

119

120 **ATP-binding and dimerization mutants of McdA are diffuse in the cytoplasm and carboxysomes**  
121 **are mispositioned.**

122 We first set out to determine the *in vivo* localization pattern of McdA when unbound from ATP, and  
123 its impact on carboxysome positioning. We substituted the invariant catalytic Lysine to an Alanine  
124 (K15A) or Glutamine (K15Q) in the deviant Walker A box of McdA (**Figure 1B**). Synonymous  
125 mutations in several other ParA-type ATPases have been shown to prevent ATP-binding (**Figure 1C**). In  
126 wild-type *S. elongatus* cells, as shown previously, mNG-McdA oscillates on the nucleoid to equidistantly  
127 position RbcS-mTQ-labeled carboxysomes down the long axis of the cell (**Figure 2A**). Both ATP-  
128 binding mutants of McdA no longer oscillated on the nucleoid, but rather were found to be diffuse in the  
129 cytoplasm and carboxysomes were mispositioned (**Figure 2, B-C**). We then substituted the invariant

130 Glycine to a Valine (G11V) in the deviant Walker A box of McdA (see Figure 1, B-C), which allows for  
131 ATP-binding, but the bulky side-chain of Valine sterically prevents dimerization (Lutkenhaus, 2012). As  
132 with the ATP-binding mutants, the dimerization mutant of McdA was also diffuse in the cytoplasm, and  
133 carboxysomes were no longer uniformly distributed in the cell (Figure 2D).

134 When we compared the nearest-neighbor spacing of carboxysome foci as a function of cell length,  
135 wild-type showed the same uniform spacing ( $0.6 \pm 0.2 \mu\text{m}$ ) regardless of cell length (Figure 2, E-F). All  
136 three mutants, on the other hand, displayed increased spacing, and variability in spacing, as cell length  
137 increased (Figure 2, E-F). The average cell lengths of the ATP-binding and dimerization mutants were  
138 significantly longer compared to wild-type (Figure 2G); a change in cell morphology that mirrors the  
139  $\Delta mcdA$  phenotype (Supplementary Figure S1A) (Rillema *et al.*, 2020).

140 The increased spacing resulted in fewer carboxysome foci per unit cell length (Figure 2H).  
141 Comparing the fluorescence intensity of carboxysome foci suggested that the increased spacing in all  
142 three mutant populations was the result of carboxysome aggregation (Figure 2I). Overall, McdA mutant  
143 strains defective for ATP-binding and dimerization displayed a cell elongation phenotype, and possessed  
144 few and irregularly-spaced carboxysome aggregates. These phenotypes match what we have previously  
145 observed in the *mcdA* deletion strain (Rillema *et al.*, 2020), which suggests a complete loss of function in  
146 carboxysome positioning when McdA cannot bind ATP and dimerize.

147

#### 148 **ATP-binding and dimerization are required for McdA to position carboxysomes on the nucleoid**

149 Plasmids deleted for their ParA-type partitioning system are no longer distributed along the nucleoid.  
150 Rather, the plasmids become nucleoid ‘excluded’ (Erdmann *et al.*, 1999; Ringgaard *et al.*, 2009;  
151 Vecchiarelli *et al.*, 2012; Planchenault *et al.*, 2020). We have shown that nucleoid exclusion also occurs  
152 for carboxysomes in *S. elongatus* strains deleted for *mcdA* or *mcdB* (MacCready *et al.*, 2018). We set out  
153 to determine if carboxysomes are nucleoid excluded in the ATP-binding and dimerization mutants of  
154 McdA. Due to the polyploid nature of *S. elongatus*, DAPI staining does not easily resolve the nucleoid  
155 region from the cytoplasm (Figure S1B). We therefore used the gyrase inhibitor ciprofloxacin to induce

156 nucleoid compaction, which increased the cytoplasmic space observable by epifluorescence microscopy.  
157 Conveniently, when wild-type *S. elongatus* cells were treated with ciprofloxacin, mNG-McdA still  
158 oscillated on the compacted nucleoid (**Movie S1**), and carboxysomes were still distributed over the  
159 nucleoid region of the cell and not in the cytoplasmic spaces (**Figure 2J**). The ATP-binding and  
160 dimerization mutants of mNG-McdA, on the other hand, remained diffuse in the cytoplasm and  
161 carboxysomes were nucleoid excluded, but in a surprising manner (**Figure 2, K-M**). Rather than having  
162 carboxysomes randomly distributed in the cytoplasmic region of the cell, the carboxysome aggregates  
163 butted-up against the ends of the compacted nucleoids (**Figure 2, K-M merged panels, and Figure**  
164 **S1C**). A similar observation was recently found for plasmids lacking their partition system (Planchenault  
165 *et al.*, 2020), suggesting this is a widespread mesoscale phenomenon for both genetic and proteinaceous  
166 complexes in a bacterial cell.

167 Many ParA family ATPases are monomeric in their apo forms and dimerize upon ATP-binding,  
168 which then licenses non-specific DNA binding *in vitro* or nucleoid binding *in vivo* (Lutkenhaus, 2012;  
169 Kiekebusch and Thanbichler, 2014). Taken together, our data suggest that ATP-binding and dimerization  
170 are prerequisite steps needed for McdA to bind the nucleoid and distribute carboxysomes within the  
171 nucleoid region of the cell.

172

### 173 **The ATP-Trap mutant McdA[D39A] does not associate with the nucleoid or McdB *in vivo***

174 To solve the sandwich-dimer structure of an McdA homolog from the cyanobacterium *Cyanothece*  
175 sp. PCC 7424, the Schumacher group made an ATP-trap mutant by substituting the catalytic Aspartate  
176 residue to an Alanine in the Walker A' box (**see Figure 1, A-B**) (Schumacher *et al.*, 2019). Synonymous  
177 ParA family mutants have been shown to form ATP-bound dimers competent for DNA-binding and  
178 interaction with their cognate ParB, but are deficient in ATP-hydrolysis (**see Figure 1C**). We made the  
179 corresponding mutation in McdA (D39A) to determine the *in vivo* localization pattern of an McdA mutant  
180 presumably trapped as an ATP-bound dimer, and its effect on carboxysome positioning. Unexpectedly,  
181 mNG-McdA[D39A] was diffuse in the cytoplasm and carboxysomes were mispositioned in a manner that



182 was identical to our ATP-binding and dimerization mutants of McdA (**Figure S2A**). The data suggests  
183 McdA[D39A] cannot bind the nucleoid due to a loss in non-specific DNA binding activity. The  
184 Schumacher group showed that ATP-bound McdA[D38A] from *Cyanothece* can dimerize and bind a non-  
185 specific DNA substrate *in vitro* (Schumacher *et al.*, 2019), however the interaction affinity with DNA was  
186 not compared to wild-type McdA. Since *S. elongatus* McdA is highly insoluble, we purified the McdA  
187 homolog from *Cyanothece* (*Ct*McdA) and its ATP-trap variant *Ct*McdA[D38A] (used to solve the McdA  
188 structure), and found via Electrophoretic Mobility Shift Assays that *Ct*McdA[D38A] has significantly  
189 reduced DNA-binding activity compared to wild-type (**Figure S2B**), which is consistent with our *in vivo*  
190 observations of the corresponding mutant in *S. elongatus* (**Figure S2A**). We also performed Bacterial  
191 Two-Hybrid assays and found that while wild-type McdA showed a strong interaction with McdB,  
192 McdA[D39A] did not (**Figure S2C**), which also explains our *in vivo* observations of this mutant in *S.*  
193 *elongatus* (**Figure S2A**). We propose the ATP-trapped dimer of McdA[D39A] does not go through the  
194 conformational change that licenses nucleoid binding, which our data suggest is a prerequisite for McdB  
195 interaction and distributing carboxysomes over the nucleoid.

196

### 197 **The ATP-Trap mutant McdA[K15R] locks onto McdB-bound carboxysomes**

198 We set out to construct another ATP-trap mutant of McdA that can adopt the nucleoid binding state  
199 and interact with McdB. Arguably the best studied ATP-trap mutant from the ParA family of ATPases  
200 comes from the P1 plasmid partitioning system (Fung *et al.*, 2001). Mutating the catalytic Lysine to an  
201 Arginine in the deviant Walker A box of P1 ParA (K122R) has shown robust *in vitro* and *in vivo*  
202 phenotypes (**see Figure 1, B-C**). *In vitro*, ParA[K122R] can bind ATP, dimerize, and bind non-specific  
203 DNA with an affinity comparable to wild-type, but irreversibly associates with ParB because ParB cannot  
204 stimulate the ATPase activity required for releasing this association (Fung *et al.*, 2001; Vecchiarelli *et al.*,  
205 2013). *In vivo*, ParA[K122R] results in a worse-than-null and dominant-negative phenotype called Par<sup>PD</sup>  
206 for “propagation-defective”, whereby plasmids are less stable than when they have no partition system at  
207 all (Youngren and Austin, 1997). Given the severity of the mutation, the mechanism for the Par<sup>PD</sup>

208 phenotype has not been directly identified *in vivo*. However, the inability to disassemble the DNA-  
209 ParA[K122R]-ParB-plasmid complex *in vitro* suggests a likely mechanism (Hwang and Vecchiarelli *et*  
210 *al.*, 2013).

211 Strikingly, the corresponding ATP-trap mutant in mNG-McdA (K15R) resulted in nearly complete  
212 colocalization with carboxysomes (Figure 3A). When *mcdB* was deleted from this strain, mNG-  
213 McdA[K15R] no longer associated with carboxysomes; instead coating the nucleoid thus showing its  
214 ability to still bind non-specific DNA (Figure 3B). The data suggest that the ATP-trap mutant,  
215 McdA[K15R], locks carboxysomes onto the nucleoid via an irreversible interaction between McdA and  
216 McdB. Consistently, Bacterial-2-Hybrid analysis showed that McdA[K15R] associates more strongly  
217 with McdB compared to wild-type McdA (Figure 3C), while all other McdA mutants studied thus far  
218 showed no interaction with McdB (Figure S2C).

219 Compared to wildtype, the McdA[K15R] mutant displayed significantly higher carboxysome foci  
220 intensities; a phenotype that was dependent on the presence of McdB (Figure 3D). Consistent with  
221 carboxysome aggregation, the McdA[K15R] mutant displayed fewer carboxysome foci per unit cell  
222 length (Figure 3E). The data suggest that McdB-stimulated ATP hydrolysis by McdA is required to  
223 disaggregate and distribute carboxysomes in the cell.

224

### 225 **The ATP-Trap mutant McdA[K15R] locks McdB-bound carboxysomes onto the nucleoid**

226 Intriguingly, McdA[K15R] in the *mcdB* deletion strain displayed increased carboxysome spacing, and  
227 variability in spacing, as cell length increased (Figure 3, F-G); a phenotype that is identical to an *mcdA*  
228 null mutant (Rillema *et al.*, 2020). With McdB present however, the McdA[K15R] strain had  
229 carboxysome spacing closer to that of wild-type (Figure 3F). Unique to the McdA[K15R] mutant,  
230 carboxysome foci were enriched within the midcell region (Figure S3). Also unlike all other McdA  
231 mutants described thus far, which were diffuse in the cytoplasm with nucleoid-excluded carboxysomes,  
232 mNG-McdA[K15R] strongly colocalized with carboxysomes over ciprofloxacin-compacted nucleoids  
233 (Figure 3H). In the  $\Delta mcdB$  background, mNG-McdA[K15R] remained associated with the compacted

234 nucleoid, once again showing this mutant retains non-specific DNA binding activity, while carboxysomes  
235 became nucleoid excluded (**Figure 3I**). Together, the data show that the ATP-trap mutant McdA[K15R]  
236 locks carboxysome aggregates onto the nucleoid via an irreversible interaction with McdB.

237 Finally, we asked if locking carboxysome aggregates onto the nucleoid in the McdA[K15R] strain  
238 resulted in the same cell elongation phenotype found for all other McdA mutants described thus far.  
239 Surprisingly, the McdA[K15R] strain did not elongate (**Figure 3J**). In fact, the McdA[K15R] cells were  
240 slightly smaller than wild-type. When *mcdB* was deleted in the McdA[K15R] strain, the cell elongation  
241 phenotype returned. The findings suggest that the pseudo-positioning of carboxysome aggregates locked  
242 onto the nucleoid is sufficient to prevent cell elongation induced by the mispositioning of nucleoid-  
243 excluded carboxysome aggregates in null mutants of the McdAB system (Rillema *et al.*, 2020).

244

#### 245 **McdA represents an unstudied subclass of ParA-family ATPases**

246 Despite the McdA structure adopting an ATP sandwich dimer as shown for other ParA ATPases  
247 (Schumacher *et al.*, 2019), McdA lacks the classical “Signature Lysine” residue in the deviant Walker A  
248 box that defines this family (see **Figure 1B**). Instead, the McdA structure identified a lysine residue, not  
249 only outside of the deviant Walker A box, but in the C-terminal half of the protein at position 151, which  
250 is employed as the Signature Lysine (**Figure 4A**) (Schumacher *et al.*, 2019). As with the classical  
251 signature Lysine, Lys151 interacts with the ATP molecule bound in the adjacent McdA monomer;  
252 making the same cross contacts to the oxygen atom connecting the  $\beta$ - and  $\gamma$ -phosphates. Sequence  
253 alignments of McdA homologs that lack the classical signature Lysine in the deviant Walker A box,  
254 invariably encode for a lysine that corresponds to Lys151 in *S. elongatus* McdA (**Figure 4A**). Given the  
255 McdA structure, sequence conservation, and biochemical data suggesting Lys151 is important for ATP  
256 binding and dimerization, we next observed the effect of mutating Lys151 to an Alanine *in vivo*. The  
257 majority of mNG-McdA[K151A] remained diffuse in the cytoplasm, while a minor fraction colocalized  
258 with few and irregularly spaced carboxysome aggregates (**Figure 4B**). Carboxysome foci intensity,  
259 spacing and average cell length were identical to that found for the other ATP-binding and dimerization

260 mutants of McdA tested in this study (**Figure S4, A-D**). Also, ciprofloxacin treatment showed  
261 carboxysome aggregates were nucleoid excluded, and once again butted-up against the nucleoid poles  
262 (**Figure 4C**). The findings highlight the importance of Lys151 as the “Signature Lysine” for an unstudied  
263 ParA subclass, in forming the ATP-bound McdA dimer competent for nucleoid binding and positioning  
264 carboxysomes.

265

### 266 **Moving the Signature Lysine of McdA into the Walker A box reconstitutes carboxysome pseudo-** 267 **positioning**

268 Remarkably, Lys151 of the McdA structure overlays exceptionally well onto the signature lysine  
269 position in the deviant Walker-A box of classical ParA family members (Schumacher *et al.*, 2019). This  
270 finding suggested that it may be possible to maintain carboxysome positioning with an McdA mutant that  
271 has its signature Lysine at position 151 reintroduced into the classical position in the deviant Walker A  
272 box at position 10 (**see Figure 4A**). To make the signature Lysine mutant, McdA[S10K, K151S], we  
273 swapped the Serine at position 10 in the deviant Walker A box with the Lysine at position 151. The  
274 mNG-McdA[K151S] phenotype mirrored that of McdA[K151A] - largely diffuse in the cytoplasm with  
275 nucleoid-excluded carboxysome aggregates (**Figure S4E**). mNG-McdA[S10K, K151S], on the other  
276 hand, largely colocalized with carboxysome foci (**Figure 5A**). Also, carboxysome spacing (**Figure 5B**)  
277 and intensity (**Figure 5C**) both trended back towards wild-type values, and ciprofloxacin treatment  
278 showed that carboxysomes were now positioned within the nucleoid region of the cell (**Figure 5D**).  
279 Together, the data suggest a pseudo-restoration of carboxysome positioning on the nucleoid. Consistently,  
280 the McdA[S10K, K151S] cell population had cell lengths revert back to wild-type (**Figure 5E**),  
281 suggesting this pseudo-positioning of carboxysomes is sufficient to alleviate the cell elongation mutant  
282 phenotype (Rillema *et al.*, 2020).

283

284

285

286

287 **DISCUSSION**

288

289 Members of the ParA family of ATPases position a wide variety of genetic and proteinaceous cargos  
290 involved in diverse biological processes (Lutkenhaus, 2012; Vecchiarelli *et al.*, 2012; Kiekebusch and  
291 Thanbichler, 2014). ATP cycling by the ParA ATPase is critical for its dynamic patterning behavior in the  
292 cell as well as its positioning activity on the cognate cargo. We recently found that the McdAB system is  
293 widespread across cyanobacteria and carboxysome-containing proteobacteria (MacCready *et al.* 2020;  
294 MacCready and Tran *et al.* 2021), yet it remains unknown how the ATPase cycle of McdA controls its  
295 oscillatory dynamics and its function in distributing carboxysomes across the nucleoid length. Several  
296 well-researched amino acid substitutions in the conserved ATP-binding site of ParA family ATPases have  
297 been used to trap the ATP cycle at specific steps. These trap mutants have served as useful probes for  
298 dissecting the molecular steps involved in ParA-based positioning reactions (**Summary in Figure 1C,**  
299 **detailed in Table S1**). To dissect how ATP mediates McdA function in positioning fluorescently-labelled  
300 carboxysomes, we introduced synonymous amino acid substitutions in the ATP-binding pocket of  
301 fluorescently-labelled McdA to trap it at specific steps of the ATP cycle. The phenotypes of these trap  
302 mutants have allowed us to correlate the known biochemistry of well-studied ParA family ATPases with  
303 specific steps in McdA action we observed here *in vivo*.

304 Overall we find that ATP-binding, dimerization, and an ATP-specific conformational change in  
305 McdA are all prerequisite steps for McdA to associate with the nucleoid via non-specific DNA binding  
306 activity (**Figure 6A**). Our findings suggest that McdB-bound carboxysomes can only interact with McdA  
307 in this DNA-binding state. Nucleoid-associated McdA tethers McdB-bound carboxysomes to the  
308 nucleoid. But ultimately, McdB stimulates ATP-hydrolysis by McdA, which reverts McdA back into its  
309 monomeric form that can no longer bind the nucleoid in the vicinity of the carboxysome. Through this  
310 Brownian-ratchet mechanism (MacCready *et al.*, 2018), McdB-bound carboxysomes are uniformly  
311 distributed as they locally generate McdA depletion zones on the nucleoid, and then move up the resulting  
312 McdA gradient towards higher concentrations (**Figure 6B**).

313 McdA mutants unable to bind ATP, dimerize, or undergo the ATP-specific conformational change  
314 required for nucleoid binding were diffuse in the cytoplasm and carboxysomes were observed as  
315 nucleoid-excluded aggregates. These mutant strains also displayed cell elongation. We have recently  
316 shown that *mcdA* and *mcdB* deletion strains also elongate (Rillema *et al.*, 2020). Heterotrophic bacteria  
317 have been shown to undergo cell elongation as a carbon-limitation response (Rangarajan *et al.*, 2020). We  
318 also recently proposed that carboxysome aggregation results in decreased carbon-fixation efficiency, and  
319 that cell elongation is a response triggered by the resulting carbon limitation in this photoautotroph  
320 (Rillema *et al.*, 2020). Since the phenotype of these McdA trap mutants mirror the *mcdA* deletion strain,  
321 our findings suggest a complete loss of function in carboxysome positioning when McdA cannot bind  
322 ATP, dimerize, and adopt its nucleoid-binding conformation.

### 323 **Nucleoid-excluded carboxysomes are trapped at the cytoplasm-nucleoid interface**

324 We previously showed that in  $\Delta mcdA$  or  $\Delta mcdB$  strains of *S. elongatus*, carboxysomes still fully  
325 assemble, but coalesce into nucleoid-excluded aggregates (MacCready *et al.*, 2018). Given the polyploid  
326 nature of *S. elongatus*, there is insufficient cytoplasmic space to resolve whether carboxysomes  
327 aggregated due to physical interactions with each other, or if they simply coalesced because of nucleoid  
328 exclusion. We used the gyrase-inhibitor ciprofloxacin to compact the nucleoid and increase the  
329 cytoplasmic space of *S. elongatus* cells. Surprisingly, we found that in the absence of a functional McdAB  
330 system, carboxysome aggregates did not diffuse into the increased cytoplasmic space of ciprofloxacin-  
331 treated cells. Instead, the aggregates were maintained at the cytoplasm-nucleoid interface. It was recently  
332 shown that large plasmids lacking their ParA-based partition system, or large DNA circles excised from  
333 the chromosome, also localize to this interface (Planchenault *et al.*, 2020). This phenomenon was  
334 plasmid-size dependent; only plasmids larger than 100 kb preferentially localized to the nucleoid edge  
335 and did not diffuse into the nucleoid-free cytoplasmic space of the cell. Our findings here show that this  
336 preferential localization to the nucleoid edge is not specific to plasmids, but is rather a widespread  
337 phenomenon in bacteria for both genetic and proteinaceous complexes on the mesoscale. Given the size-

338 dependence of nucleoid-evicted complexes being unable to penetrate the cytoplasm, we believe the most  
339 parsimonious explanation is that carboxysomes, and other mesoscale complexes, perceive the cytoplasmic  
340 environment as glassy (Parry *et al.*, 2014); thus exhibit caging and subdiffusive behaviors at the nucleoid-  
341 cytoplasm interface.

342 Remarkably, wildtype cells treated with ciprofloxacin still displayed mNG-McdA oscillations and  
343 carboxysomes were still distributed over the highly compacted nucleoid. The data suggest that the  
344 McdAB system can distribute carboxysomes regardless of whether the nucleoid is expanded or in an  
345 extremely compacted state. This finding has implications for identifying the forces responsible for  
346 carboxysome movement and positioning within the nucleoid region of the cell.

#### 347 **The ATP-trap mutant McdA[K15R] locks carboxysomes onto the nucleoid**

348 We identified the ATP-trap mutant, McdA[K15R], that locks the nucleoid-McdA-McdB-  
349 carboxysome ternary complex. In the absence of McdB, mNG-McdA[K15R] still coated the nucleoid  
350 showing that it retains non-specific DNA binding activity, but carboxysomes were nucleoid excluded. In  
351 the presence of McdB, mNG-McdA[K15R] completely colocalized with massive carboxysome  
352 aggregates over the nucleoid. Together the findings show that McdA on the nucleoid transiently interacts  
353 with McdB on carboxysomes. McdB then stimulates McdA ATP-hydrolysis and release from the  
354 nucleoid in the vicinity of carboxysomes, which allows for continued movement up the resulting McdA  
355 gradient. Without the ability to hydrolyze ATP, McdA[K15R] irreversibly associates with McdB and  
356 statically tethers carboxysomes to the nucleoid. Since the ATP cycle cannot rest, McdB-bound  
357 carboxysomes act as a sink for all McdA[K15R] in the cell, which explains the absence of mNG-  
358 McdA[K15R] redistribution across the nucleoid.

359 All McdA mutants that result in nucleoid-excluded carboxysome aggregation also showed a cell  
360 elongation phenotype. The McdA[K15R] strain, on the other hand, displayed carboxysome aggregates on  
361 the nucleoid and no cell elongation phenotype. In contrast, the cells were slightly shorter than wild-type.

362 We have two hypotheses that could explain this phenotype. First, tethering carboxysomes to the nucleoid  
363 could allow for pseudo-positioning of carboxysomes. This “pilot-fish” mode of carboxysome positioning  
364 and inheritance could sufficiently improve carbon-fixation efficiency, thereby preventing carbon  
365 limitation and the cell elongation response. Alternatively, it can be envisioned that irreversibly tethering  
366 massive carboxysomes onto the nucleoid can have detrimental effects to a variety of DNA transactions  
367 such as DNA replication, transcription, nucleoid organization and compaction, and faithful chromosome  
368 segregation. Therefore the shorter cell length could simply be attributed to a slower growth rate.

### 369 **Swapping the Signature Lysine position in McdA resulted in carboxysome pseudo-positioning on** 370 **the nucleoid**

371 McdA represents a previously unstudied subclass of the ParA family, where the signature Lysine  
372 residue that defines this ATPase family is located in the C-terminal half of the protein, rather than in the  
373 Walker A box (see Figure 4A). We find here that Lysine151 is indeed necessary for McdA to bind the  
374 nucleoid and position carboxysomes. Strikingly, we also found that repositioning this Lysine into the  
375 classical signature Lysine position in the Walker A box reconstituted carboxysome pseudo-positioning –  
376 carboxysome spacing and focal intensity trended back to wild-type values. This mutant also reverted back  
377 to wildtype cell lengths. However, the oscillatory dynamics observed with wildtype McdA were not  
378 reconstituted. Instead, mNG-McdA[S10K, K151S] colocalized with carboxysomes over the nucleoid.  
379 This mode of carboxysome positioning is similar to that observed for the P1 plasmid partition system. P1  
380 ParB forms punctate foci by loading onto and around a DNA binding site called *parS* on the plasmid to be  
381 partitioned (Erdmann *et al.*, 1999; Sengupta *et al.*, 2010). The ParA ATPase uniformly distributes over  
382 the nucleoid, but also forms foci that colocalize with relatively immobile ParB-bound plasmids (Hatano  
383 and Niki, 2010). During plasmid partitioning and movement, the colocalized ParA foci disappear and  
384 only reappear once the sister plasmids have reached the  $\frac{1}{4}$  and  $\frac{3}{4}$  positions of the cell where they once  
385 again become relatively immobile. McdA has an ATPase activity two-orders of magnitude greater than  
386 ParA ATPases with a classical signature Lysine (MacCready *et al.*, 2018). It is attractive to speculate that



387 the Lysine-swap mutant of McdA decreases its voracious ATPase activity, causing it to remain associated  
388 with McdB-bound carboxysomes for a longer period of time and adopting a “stick-and-move” mode of  
389 carboxysomes positioning over the nucleoid; similar to the P1 plasmid partition reaction described above.

390 Why does McdA have such a greater ATPase rate compared to classical ParA-type ATPases? We  
391 believe the answer lies in the difference in cargo copy-number in the cell. ParA-based DNA segregation  
392 systems are typically found on bacterial chromosomes and large low-copy plasmids. In both cases, the  
393 DNA is replicated and the sister copies are then segregated to opposing halves of the cell prior to division.  
394 Carboxysome copy number, on the other hand, can be significantly higher and varies depending on  
395 growth conditions. For example, when grown with high-light intensity, a single *S. elongatus* cell can  
396 contain up to a dozen carboxysomes (Sun *et al.*, 2016). We propose that for high-copy-number cargos, an  
397 increased ATPase activity is required to compensate for the decreased nearest-neighbor distance between  
398 adjacent cargos sharing the same nucleoid matrix. The increased ATPase rate would make the McdA  
399 gradient on the nucleoid more sensitive to carboxysome movements over these smaller spatial scales.

400  
401  
402  
403  
404  
405  
406  
407  
408  
409  
410  
411  
412  
413  
414  
415  
416  
417  
418  
419  
420  
421

## 422 MATERIALS AND METHODS:

423

### 424 Construct design

425 All constructs were made using Gibson assembly (Gibson *et al.*, 2009) from PCR fragments or  
426 synthesized dsDNA (Integrated DNA Technologies) and verified by Sanger sequencing. For *mcdB*  
427 deletion and native fluorescent fusion gene insertions into the *S. elongatus* genome, constructs were made  
428 as previously described (MacCready *et al.*, 2018).

429

### 430 Growth conditions and transformations

431 All *S. elongatus* (ATCC® 33912™) strains were grown in 125 mL baffled flasks (Corning) in 50 mL BG-  
432 11 medium (Sigma) pH 8.3 buffered with 1g/L HEPES. Cells were cultured in a Minitron incubation  
433 system (Infors-HT) with the following growth conditions: 60  $\mu\text{mol m}^{-2} \text{s}^{-1}$  continuous LED 5600K light,  
434 32°C, 2% CO<sub>2</sub>, and shaking at 130 RPM. Plasmids were cloned in chemically competent One Shot™  
435 TOP10 *E. coli* cells (Thermo Fisher Scientific) in standard manipulation and culture conditions (Green  
436 and Sambrook 2012). Transformations of *S. elongatus* cells were performed as previously described  
437 (Clerico *et al.*, 2007). Transformant cells were plated on BG-11 agar with 12.5  $\mu\text{g/ml}$  kanamycin, 12.5  
438  $\mu\text{g/ml}$  chloramphenicol or 25  $\mu\text{g/ml}$  spectinomycin. Single colonies were picked and transferred into 96-  
439 well plates containing BG-11 medium with corresponding antibiotic concentrations. Complete gene  
440 insertions and absence of the wildtype gene were verified via PCR and cultures were removed from  
441 antibiotic selection by three series of back dilution prior to imaging.

442

### 443 Ciprofloxacin treatment and nucleoid visualization

444 To induce nucleoid compaction, *S. elongatus* cells were incubated with 50  $\mu\text{M}$  ciprofloxacin overnight  
445 under normal growth conditions. To visualize the compacted nucleoid region, ciprofloxacin-treated *S.*  
446 *elongatus* cells were harvested by centrifugation at 4,000 x g for 1 minute. The pelleted cells were then  
447 washed and resuspended in 100  $\mu\text{l}$  of PBS (pH 7.2). DAPI (8  $\mu\text{l}$  from a 20  $\mu\text{g/ml}$  stock concentration) was  
448 added to the cell suspension followed by 20-minute incubation in the dark at 30°C. DAPI-stained cells  
449 were washed twice with 1 ml H<sub>2</sub>O, and then resuspended in 100  $\mu\text{l}$  H<sub>2</sub>O prior to visualization using the  
450 DAPI channel.

451

### 452 Fluorescence Microscopy

453 Exponentially growing cells (2 mls of cells at OD<sub>750</sub> ~ 0.7) were harvested and spun down at 4,000 x g for  
454 1 min, resuspended in 200  $\mu\text{l}$  fresh BG-11 and 2  $\mu\text{l}$  was then transferred to a 1.5% UltraPure agarose  
455 (Invitrogen) + BG-11 square pad on a glass-bottom dish (MatTek Life Sciences). All fluorescence and  
456 phase contrast imaging were performed using a Nikon Ti2-E motorized inverted microscope controlled by  
457 NIS Elements software with a SOLA 365 LED light source, a 100X Objective lens (Oil CFI Plan  
458 Apochromat DM Lambda Series for Phase Contrast), and a Photometrics Prime 95B Back-illuminated  
459 sCMOS camera. mNG-McdA variants were imaged using a “YFP” filter set (C-FL YFP, Hard Coat, High  
460 Signal-to-Noise, Zero Shift, Excitation: 500/20nm [490-510nm], Emission: 535/30nm [520-550nm],  
461 DichroicMirror: 515nm). RbcS-mTQ labelled carboxysomes were imaged using a “CFP” filter set (C-FL  
462 CFP, Hard Coat, High Signal-to-Noise, Zero Shift, Excitation: 436/20nm [426-446nm], Emission:  
463 480/40nm [460-500nm], Dichroic Mirror: 455nm). DAPI fluorescence was imaged using a standard  
464 “DAPI” filter set (C-FL DAPI, Hard Coat, High Signal-to-Noise, Zero Shift, Excitation: 350/50nm [325-  
465 375nm], Emission: 460/50nm [435-485nm], Dichroic Mirror: 400nm). Image analysis was performed  
466 using Fiji v1.53b (Schindelin *et al.*, 2012).

467

468

## 469 **Image Analysis**

470 Image analysis including cell segmentation, quantification of cell length, foci number, intensity and  
471 spacing were performed using Fiji plugin MicrobeJ 5.13I (Ducret *et al.*, 2016). Cell perimeter detection  
472 and segmentation were done using the rod-shaped descriptor with default threshold settings.  
473 Carboxysome detection was performed using the smoothed foci function with tolerance of 50 and Z-score  
474 of 30. Data were exported, further tabulated, graphed and analyzed using GraphPad Prism 9.0.1 for  
475 macOS, GraphPad Software, San Diego, California USA, [www.graphpad.com](http://www.graphpad.com).

476

## 477 **Bacterial Two-Hybrid**

478 N-terminal T18 and T25 fusions of McdA, all McdA mutant variants, and McdB were constructed using  
479 the plasmids pKT25 and pUT18C. Plasmids were sequence-verified and co-transformed into *E. coli*  
480 BTH101 in both pairwise combinations (Karimova *et al.*, 1998). Several colonies of T18/T25  
481 cotransformants were cultured in LB medium with 100 mg/ml ampicillin, 50 mg/ml kanamycin and 0.5  
482 mM IPTG overnight at 30°C with 225 rpm shaking. Overnight cultures were spotted on indicator LB X-  
483 gal plates supplemented with 100 mg/ml ampicillin, 50 mg/ml kanamycin and 0.5 mM IPTG. Plates were  
484 incubated in the dark at 30°C up to 48 hours before imaging.

485

## 486 **Expression and purification of CtMcdA and CtMcdA[D38A]**

487 Both CtMcdA and CtMcdA[D38A] were expressed and purified in a similar manner. For protein  
488 production, the expression plasmids for these constructs (Schumacher *et al.*, 2019) were transformed into  
489 *E. coli* C41(DE3) cells (Lucigen). Transformants were grown at 37°C and 225 rpm until an OD<sub>600</sub> of 0.4–  
490 0.6 was reached. The culture flasks were rapidly cooled down to 15°C on and protein expression was then  
491 induced with the addition of 1 mM IPTG. After overnight induction, the cells were pelleted, flash frozen  
492 in liquid nitrogen and stored at -80°C. Harvested cells were resuspended in Buffer A (25 mM Tris-HCl  
493 pH 7.5, 300 mM NaCl, 10% glycerol, 0.5 mM BME, 50 mg/ml lysozyme, 1.25 kU benzonase, 2 Protease  
494 Inhibitor Cocktail tablets) and lysed using a probe sonicator with 15 s on, 15 s off pulsation for 8 min.  
495 The lysate was cleared by centrifugation at 12,000 x g at 4 °C for 40 min in a Fiberlite TM F15-8 x 50 cy  
496 Fixed Angle Rotor (ThermoFisher Scientific). The resulting lysate was filtered through a 0.45 µm syringe  
497 filter and loaded onto a 5 ml HiTrap™ TALON Crude cassette (GE) and eluted with a 0 to 400 mM  
498 imidazole gradient. Peak fractions were pooled and concentrated using an Amicon Ultra Centrifugal  
499 Device (10 KD MWCO). The concentrated protein sample was passed through a HiPrep 26/10 Desalting  
500 Column (GE) equilibrated in Q-Buffer (25mM Tris-HCl pH 7.5, 150 mM NaCl, 10% glycerol, 1mM  
501 EDTA, 1mM DTT). The sample was then immediately loaded onto a HiTrap™ Q HP 5 ml cassette (GE)  
502 equilibrated in Q-Buffer. The protein was eluted with a 150 mM to 2 M NaCl gradient. Peak fractions  
503 were concentrated to no more than 70 mM and flash frozen aliquots were kept at -80°C.

504

## 505 **DNA binding assay**

506 Electrophoretic mobility shift assays (EMSAs) were performed in a final reaction volume of 10µl in a  
507 buffer containing 50 mM HEPES (pH 7.6), 5 mM MgCl<sub>2</sub>, and 100 mM KCl with 10nM pUC19 plasmid  
508 (2.8 kb) as the supercoiled DNA substrate. At the concentrations indicated, His-CtMcdA and His-  
509 CtMcdA[D38A] were incubated for 30 min at 23°C with or without ATP (1 mM). Reactions were then  
510 mixed with 1 µl 80 % glycerol, run on 1 % agarose gel in 1X TAE at 110V for 45 min and stained with  
511 ethidium bromide for imaging.

512

## 513 **Protein structure visualization and prediction**

514 Molecular graphics and analyses of protein structures were performed with USCF Chimera, developed by  
515 the Resource for Biocomputing, Visualization and Informatics at the University of California, San

516 Francisco, with support from NIH P41-GM103311 (Pettersen *et al.*, 2004). Prediction of *SeMcdA*  
517 structure was performed with Phyre2 (Kelley *et al.*, 2015).

518  
519

## 520 ACKNOWLEDGEMENTS

521

522 We would like to thank Joshua MacCready, Kiyoshi Mizuuchi, Maria Schumacher and David Savage for  
523 helpful discussions. The pET15b expression vectors used for *CtMcdA* and *CtMcdA*[D38A] were kind  
524 gifts from Maria Schumacher. This work is supported by the National Science Foundation to A.G.V.  
525 (Award No. 1817478 and CAREER Award No. 1941966), Rackham Graduate Research Grant to P.H.,  
526 Rackham Professional Development Grant to P.H., American Society for Microbiology Research  
527 Capstone Fellowship to P.H., Margaret Dow Towsley Scholarship to P.H. and by research initiation fund  
528 to A.G.V. provided by the MCDB department, University of Michigan.

529

530

## 531 REFERENCES:

532

533 Ah-Seng, Y, Lopez, F, Pasta, F, Lane, D, Bouet, J-Y (2009). Dual role of DNA in regulating ATP  
534 hydrolysis by the SopA partition protein. *J Biol Chem* 284, 30067-30075.

535 Ah-Seng, Y, Rech, J, Lane, D, Bouet, J-Y (2013). Defining the role of ATP hydrolysis in mitotic  
536 segregation of bacterial plasmids. *PLoS Genet* 9, e1003956.

537 Badrinarayanan, A, Le, TBK, Laub, MT (2015). Bacterial chromosome organization and segregation.  
538 *Annu Rev Cell Dev Biol* 31, 171-199.

539 Barillà, D, Rosenberg, MF, Nobbmann, U, Hayes, F (2005). Bacterial DNA segregation dynamics  
540 mediated by the polymerizing protein ParF. *EMBO J* 24, 1453-1464.

541 Baxter, JC, Funnell, BE (2014). Plasmid Partition Mechanisms. *Microbiol Spectr.* 2:PLAS-0023-2014.

542 Clerico, EM, Ditty, JL, Golden, SS (2007). Specialized techniques for site-directed mutagenesis in  
543 cyanobacteria. In: *Circadian Rhythms: Methods and Protocols*. ed. E. Rosato, New Jersey: Humana Press,  
544 155-171.

545 Cohen, Y, Gurevitz, M (2006). The Cyanobacteria - Ecology, Physiology and Molecular Genetics. In:  
546 *The Prokaryotes: Volume 4: Bacteria: Firmicutes, Cyanobacteria*. ed. M. Dworkin, S. Falkow, E.  
547 Rosenberg, K-H. Schleifer, E. Stackebrandt. New York: Springer US, 1074-1098.

548 Corrales-Guerrero, L, He, B, Refes, Y, Panis, G, Bange, G, Viollier, PH, Steinchen, W, Thanbichler, M  
549 (2020). Molecular architecture of the DNA-binding sites of the P-loop ATPases MipZ and ParA  
550 from *Caulobacter crescentus*, *Nucleic Acids Res* 48, Issue 9, 4769-4779.

551 Davey, M, Funnell, BE (1997). Modulation of the P1 plasmid partition protein ParA by ATP, ADP, and  
552 P1 ParB. *J Biol Chem* 272, 15286-15292.

553 Ducret, A, Quardokus, EM, Brun, Y V. (2016). MicrobeJ, a tool for high throughput bacterial cell  
554 detection and quantitative analysis. *Nat Microbiol* 1, 1-7.

555 Dunham, TD, Xu, W, Funnell, BE, Schumacher, MA (2009). Structural basis for ADP-mediated  
556 transcriptional regulation by P1 and P7 ParA. *EMBO J* 28, 1792-1802.

557

- 558 Erdmann, N, Petroff, T, Funnell, BE (1999). Intracellular localization of P1 ParB protein depends on  
559 ParA and parS. *Proc Natl Acad Sci USA* 96, 14905-14910.
- 560 Fung, E, Bouet, J-Y, Funnell, BE (2001). Probing the ATP-binding site of P1 ParA: partition and  
561 repression have different requirements for ATP binding and hydrolysis. *EMBO J* 20, 4901-4911.
- 562 Funnell, BE (2016). ParB Partition Proteins: Complex formation and spreading at bacterial and plasmid  
563 centromeres. *Front Mol Biosci* 3, 44.
- 564 Gibson, DG, Young, L, Chuang, RY, Venter, JC, Hutchison, CA, Smith, HO (2009). Enzymatic assembly  
565 of DNA molecules up to several hundred kilobases. *Nat Methods* 6, 343-345.
- 566 Green, MR, Sambrook, J (2012). Molecular Cloning: A Laboratory Manual, Fourth Edition. New York:  
567 Cold Spring Harbor Laboratory Press.
- 568 Hatano, T, Niki, H (2010). Partitioning of P1 ParA plasmids by gradual distribution of the ATPase ParA.  
569 *Mol Microbiol* 78, 1182-1198.
- 570 Hatano, T, Yamaichi, Y, Niki, H (2007). Oscillating focus of SopA associated with filamentous structure  
571 guides partitioning of F plasmid. *Mol Microbiol* 64, 1198-1213.
- 572 Hester, CM, Lutkenhaus, J (2007). Soj (ParA) DNA binding is mediated by conserved arginines and is  
573 essential for plasmid segregation. *Proc Natl Acad Sci USA* 104, 20326-20331.
- 574 Hwang, LC, Vecchiarelli, AG, Han, YW, Mizuuchi, M, Harada, Y, Funnell, BE, Mizuuchi, K (2013).  
575 ParA-mediated plasmid partition driven by protein pattern self-organization. *EMBO J* 32, 1238-1249.
- 576 Jalal, ASB, Le, TBK (2020). Bacterial chromosome segregation by the ParABS system. *Open Biol* 10,  
577 200097.
- 578 Karimova, G, Pidoux, J, Ullmann, A, Ladant, D (1998). A bacterial two-hybrid system based on a  
579 reconstituted signal transduction pathway. *Proc. Natl. Acad. Sci. USA* 95, 5752-5756.
- 580 Kelley, LA, Mezulis, S, Yates, CM, Wass, MN, Sternberg, MJ (2016). The Phyre2 web portal for protein  
581 modeling, prediction and analysis. *Nat Protoc* 10, 845-858.
- 582 Kerfeld, CA, Aussignargues, C, Zarzycki, J, Cai, F, Sutter, M (2018). Bacterial microcompartments. *Nat*  
583 *Rev Microbiol* 16, 277-290.
- 584 Kiekebusch, D, Michie, KA, Essen, LO, Löwe, J, Thanbichler, M (2012). Localized dimerization and  
585 nucleoid binding drive gradient formation by the bacterial cell division inhibitor MipZ. *Mol Cell* 46, 245-  
586 259.
- 587 Kiekebusch, D, Thanbichler, M (2014). Spatiotemporal organization of microbial cells by protein  
588 concentration gradients. *Trends Microbiol* 22, 65-73.
- 589 Koonin, EV (1993). A superfamily of ATPases with diverse functions containing either classical or  
590 deviant ATP-binding motif. *J Mol Biol* 229, 1165-1174.
- 591 Leonard, TA, Butler, PJ, Lowe, J (2005). Bacterial chromosome segregation: structure and DNA binding  
592 of the Soj dimer - a conserved biological switch. *EMBO J* 24, 270-282.
- 593 Libante, V, Thion, L, Lane, D (2001). Role of the ATP-binding site of SopA protein in partition of the F  
594 plasmid. *J Mol Biol* 314, 387-399.
- 595

- 596 Lin, L, Osorio Valeriano, M, Harms, A, Søgaard-Andersen, L, Thanbichler, M (2017). Bactofilin-  
597 mediated organization of the ParABS chromosome segregation system in *Myxococcus xanthus*. *Nat*  
598 *Commun* 8, 1817.
- 599 Lutkenhaus, J (2012). The ParA/MinD family puts things in their place. *Trends Microbiol* 20, 411-418.
- 600 Lutkenhaus, J, Sundaramoorthy, M (2003). MinD and role of the deviant Walker A motif, dimerization  
601 and membrane binding in oscillation. *Mol Microbiol* 48, 295-303.
- 602 MacCready, JS, Basalla, JL, Vecchiarelli, AG (2020). Origin and evolution of carboxysome positioning  
603 systems in cyanobacteria. *Mol Biol Evol* 37, 1434–1451.
- 604  
605 MacCready, JS, Hakim, P, Young, EJ, Hu, L, Liu, J, Osteryoung, KW, Vecchiarelli, AG, Ducat, DC  
606 (2018). Protein gradients on the nucleoid position the carbon-fixing organelles of cyanobacteria. *eLife*,  
607 7:e39723.
- 608 MacCready, JS, Tran, L, Basalla, JL, Hakim, P, Vecchiarelli, AG (2021). The McdAB system positions  
609  $\alpha$ -carboxysomes in proteobacteria. *Mol Microbiol* 00, 1–21.
- 610  
611 Ono, H, Takashima, A, Hirata, H, Homma, M, Kojima, S (2015). The MinD homolog FlhG regulates the  
612 synthesis of the single polar flagellum of *Vibrio alginolyticus*. *Mol Microbiol* 98, 130-141.
- 613 Park, KT, Wu, W, Lovell, S, Lutkenhaus, J (2012). Mechanism of the asymmetric activation of the MinD  
614 ATPase by MinE. *Mol Microbiol* 85,271-281.
- 615 Parry, BR, Surovtsev, IV, Cabeen, MT, O’Hern, CS, Dufresne, ER, Jacobs-Wagner, C (2014). The  
616 bacterial cytoplasm has glass-like properties and is fluidized by metabolic activity. *Cell* 156, 183-194.
- 617 Pettersen, EF, Goddard, TD, Huang, CC, Couch, GS, Greenblatt, DM, Meng, EC, Ferrin, TE (2004).  
618 UCSF Chimera—A visualization system for exploratory research and analysis. *J Comput Chem* 25, 1605-  
619 1612.
- 620 Planchenault, C, Pons, CM, Shiavon, C, Siguier, P., Rech, J, Guynet, C, Dauverd-Girault, J, Cury, J,  
621 Rocha, EPC, Junier, I, et al. (2020). Intracellular positioning systems limit the entropic eviction of  
622 secondary replicons toward the nucleoid edges in bacterial cells. *J Mol Biol* 432, 745-761.
- 623 Pratto, F, Cicek, A, Weihofen, WA, Lurz, R, Saenger, W, Alonso, JC (2008). *Streptococcus pyogenes*  
624 pSM19035 requires dynamic assembly of ATP-bound ParA and ParB on parS DNA during plasmid  
625 segregation. *Nucl Acids Res* 36, 3676-3689.
- 626 Ptacin, JL, Gahlmann, A, Bowman, GR, Perez, AM, von Diezmann, ARS, Eckart, MR, Moerner, WE,  
627 Shapiro, L (2014). Bacterial scaffold directs centromere movement. *Proc Natl Acad Sci USA* 111, E2046-  
628 E2055.
- 629 Ptacin, JL, Lee, SF, Garner, EC, Toro, E, Eckart, M, Comolli, LR, Moerner, WE, Shapiro, L (2010). A  
630 spindle-like apparatus guides bacterial chromosome segregation. *Nat Cell Biol* 12, 791–798.
- 631 Rangarajan, AA, Koropatkin, NM, Biteen, JS (2020). Nutrient-dependent morphological variability of  
632 *Bacteroides thetaiotaomicron*. *Microbiology* 166, 624-628.
- 633 Rillema, R, MacCready, JS, Vecchiarelli, AG (2020). Cyanobacterial growth and morphology are  
634 influenced by carboxysome positioning and temperature. *BioRxiv*, 2020.06.01.127845.
- 635 Ringgaard, S, Zepeda-Rivera, M, Wu, X, Schirner, K, Davis, BM, Waldor, MK (2014). ParP prevents  
636 dissociation of CheA from chemotactic signaling arrays and tethers them to a polar anchor. *Proc Natl*  
637 *Acad Sci USA* 111, E255-E264.

638

639 Ringgaard, S, Van Zon, J, Howard, M, Gerdes, K (2009). Movement and equipositioning of plasmids by  
640 ParA filament disassembly. *Proc Natl Acad Sci USA* 106, 19369-19374.

641 Roberts, MAJ, Wadhams, GH, Hadfield, KA, Tickner, S, Armitage, JP (2012). ParA-like protein uses  
642 nonspecific chromosomal DNA binding to partition protein complexes. *Proc Natl Acad Sci USA* 109,  
643 6698-6703.

644 Sanchez, A, Cattoni, DI, Walter, J-C, Rech, J, Parmeggiani, A, Nollmann, M, Bouet, J-Y (2015).  
645 Stochastic self-assembly of ParB proteins builds the bacterial DNA segregation apparatus. *Cell Syst* 1,  
646 163-173.

647 Savage, DF, Afonso, B, Chen, AH, Silver, PA (2010). Spatially ordered dynamics of the bacterial carbon  
648 fixation machinery. *Science* 327, 1258.

649 Schindelin, J, Arganda-Carreras, I, Frise, E, Kaynig, V, Longair, M, Pietzsch, T, Preibisch, S, Rueden,  
650 C, Saalfeld, S, Schmid, B, et al. (2012). Fiji: An open-source platform for biological-image analysis. *Nat*  
651 *Methods* 9, 676-682.

652 Schuhmacher, JS, Rossman, F, Dempwolff, F, Knauer, C, Altegoer, F, Steinchen, W, Dörrich, AK,  
653 Klingl, A, et al. (2015). MinD-like ATPase FlhG effects location and number of bacterial flagella during  
654 C-ring assembly. *Proc Natl Acad Sci USA* 112, 3092-3097.

655 Schumacher, D, Bergeler, S, Harms, A, Vonck, J, Huneke-Vogt, S, Frey, E, Søgaard-Andersen, L (2017).  
656 The PomXYZ proteins self-organize on the bacterial nucleoid to stimulate cell division. *Dev Cell* 41, 299-  
657 314.

658 Schumacher, MA, Henderson, M, Zhang, H (2019). Structures of maintenance of carboxysome  
659 distribution Walker-box McdA and McdB adaptor homologs. *Nucleic Acids Res* 47, 5950-5962.

660 Schumacher, MA, Ye, Q, Barge, MT, Zampini, M, Barilla, D, Hayes, F (2012). Structural mechanism of  
661 ATP-induced polymerization of the partition factor ParF: Implications for DNA segregation. *J Biol Chem*  
662 287, 26146-26154.

663 Sengupta, M, Nielsen, HJ, Youngren, B, Austin, S (2010). P1 plasmid segregation: Accurate  
664 redistribution by dynamic plasmid pairing and separation. *J Bacteriol* 192, 1175-1183.

665 Shaner, NC, Lambert, GG, Chammas, A, Ni, Y, Cranfill, PJ, Baird, MA, Sell, BR, Allen, JR, Day, RN,  
666 Israelsson, M, et al. (2013). A bright monomeric green fluorescent protein derived from *Branchiostoma*

667 Sun, Y, Casella, S, Fang, Y, Huang, F, Faulkner, M, Barrett, S, Liu, LN (2016). Light modulates the  
668 biosynthesis and organization of cyanobacterial carbon fixation machinery through photosynthetic  
669 electron flow. *Plant Physiol* 171, 530-541.

670 Thanbichler, M, Shapiro, L (2006). MipZ, a spatial regulator coordinating chromosome segregation with  
671 cell division in *Caulobacter*. *Cell* 126, 147-162.

672 Toro, E, Hong, S, McAdams, HH, Shapiro, L (2008). *Caulobacter* requires a dedicated mechanism to  
673 initiate chromosome segregation. *Proc Natl Acad Sci USA* 105, 15435-15440.

674 Treuner-Lange, A, Aguiluz, K, van der Does, C, Gómez-Santos, N, Harms, A, Schumacher, D, Lenz, P,  
675 Hoppert, M, Kahnt, J, Muñoz-Dorado, J, Søgaard-Andersen, L (2013). PomZ, a ParA-like protein,  
676 regulates Z-ring formation and cell division in *Myxococcus xanthus*. *Mol Microbiol* 87, 235-53.

677

- 678 Turmo, A, Gonzalez-Esquer, CR, Kerfeld, CA (2017). Carboxysomes: metabolic modules for CO<sub>2</sub>  
679 fixation. *FEMS Microbiol Lett* 364.
- 680 Vecchiarelli, AG, Han, Y-W, Tan, X, Mizuuchi, M, Ghirlando, R, Biertümpfel, C, Funnell, BE,  
681 Mizuuchi, K (2010). ATP control of dynamic P1 ParA-DNA interactions: a key role for the nucleoid in  
682 plasmid partition. *Mol Microbiol* 78, 78-91.
- 683 Vecchiarelli, AG, Havey, JC, Ing, LL, Wong, EOY, Waples, WG, Funnell, BE (2013). Dissection of the  
684 ATPase active site of P1 ParA reveals multiple active forms essential for plasmid partition. *J Biol Chem*  
685 288, 17823-7831.
- 686 Vecchiarelli, AG, Mizuuchi, K, Funnell, BE (2012). Surfing biological surfaces: Exploiting the nucleoid  
687 for partition and transport in bacteria. *Mol Microbiol* 86, 513-523.
- 688 Vecchiarelli, AG, Neuman, KC, Mizuuchi, K (2014). A propagating ATPase gradient drives transport of  
689 surface-confined cellular cargo. *Proc Natl Acad Sci USA* 111, 4880-4885.
- 690 Volante, A, Alonso, JC (2015). Molecular anatomy of ParA-ParA and ParA-ParB interactions during  
691 plasmid partitioning. *J Biol Chem* 290, 18782-18795.
- 692 Youngren, B, Austin, S (1997). Altered ParA partition proteins of plasmid P1 act via the partition site to  
693 block plasmid propagation. *Mol Microbiol* 25, 1023-1030.
- 694 Zhang, H, Schumacher, MA (2017). Structures of partition protein para with nonspecific DNA and ParB  
695 effector reveal molecular insights into principles governing Walker-box DNA segregation. *Genes Dev* 31,  
696 481-492.
- 697 Zhou, H, Schulze, R, Cox, S, Saez, C, Hu, Z, Lutkenhaus, J (2005). Analysis of MinD mutations reveals  
698 residues required for MinE stimulation of the MinD ATPase and residues required for MinC interaction. *J*  
699 *Bacteriol* 187, 629-638.
- 700  
701  
702  
703  
704  
705  
706  
707  
708  
709  
710  
711  
712  
713  
714  
715  
716  
717  
718  
719  
720  
721  
722



723  
724  
725

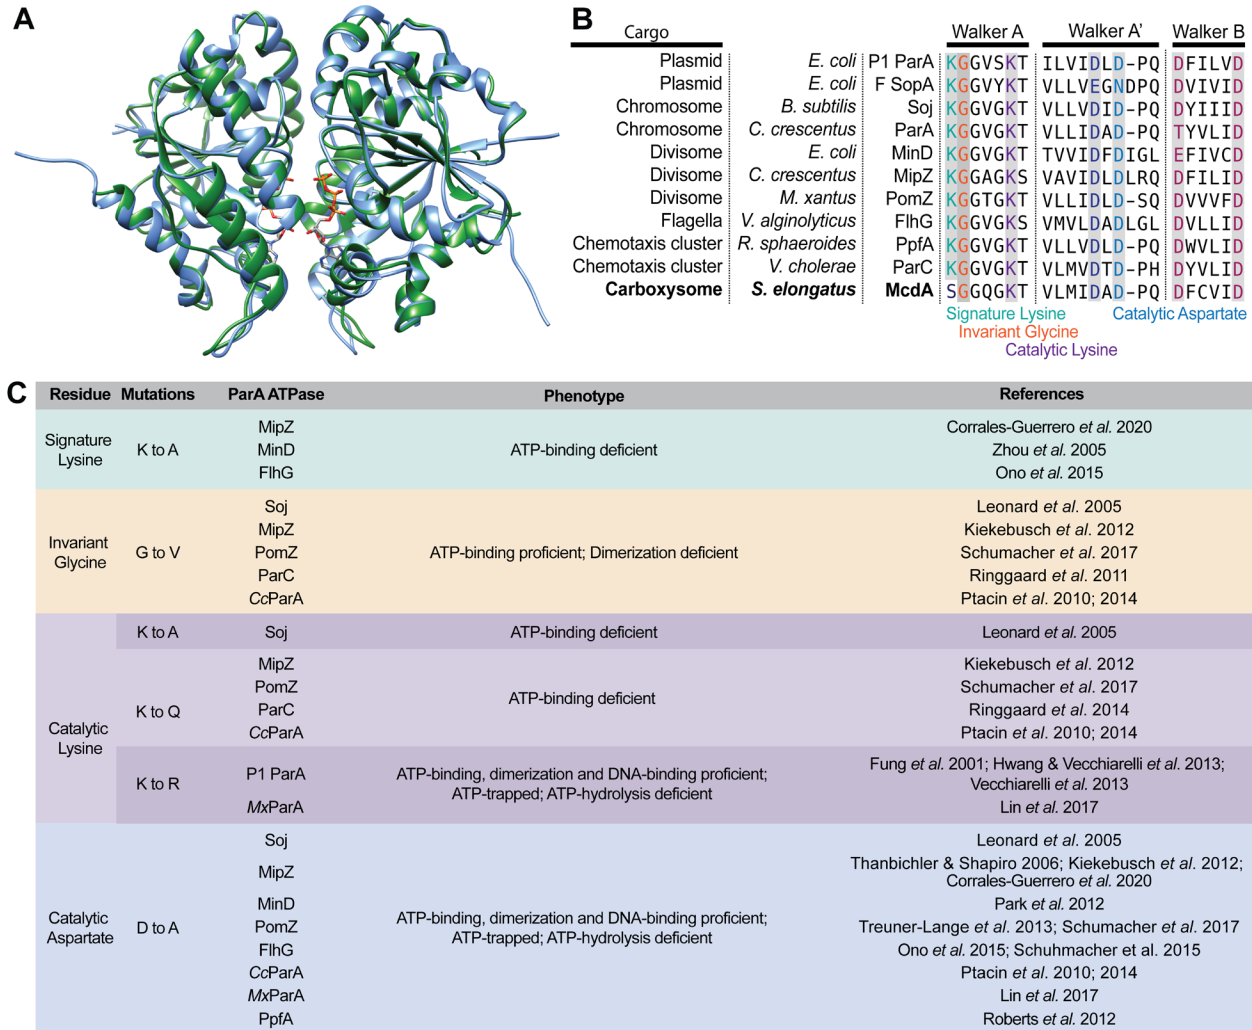

726  
727  
728  
729  
730  
731  
732  
733  
734  
735  
736  
737  
738  
739  
740  
741  
742  
743

**Figure 1: McdA shares structure and sequence conservation with ParA-type ATPases.** (A) The crystal structure of *Cyanothece* McdA[D38A] (green; PDB entry 6nop) was superimposed on to the modelled structure of *S. elongatus* McdA (blue) with ATP molecules (sticks) in the sandwich dimer interface. (B) Amino acid sequence alignment of the Walker A, A' and B motifs conserved among ParA family ATPases. Invariant residues are shaded grey. The signature lysine (green), invariant glycine (orange) and catalytic lysine (purple) in the Walker A motif and the catalytic aspartate in the Walker A' motif were mutated in this study. (C) Summary of strategic mutations studied in ParA family members and their associated phenotypes; Cc: *Caulobacter crescentus*, Mx: *Myxococcus xanthus*. Refer to [Table S1](#) for a more detailed summary of mutant phenotypes.

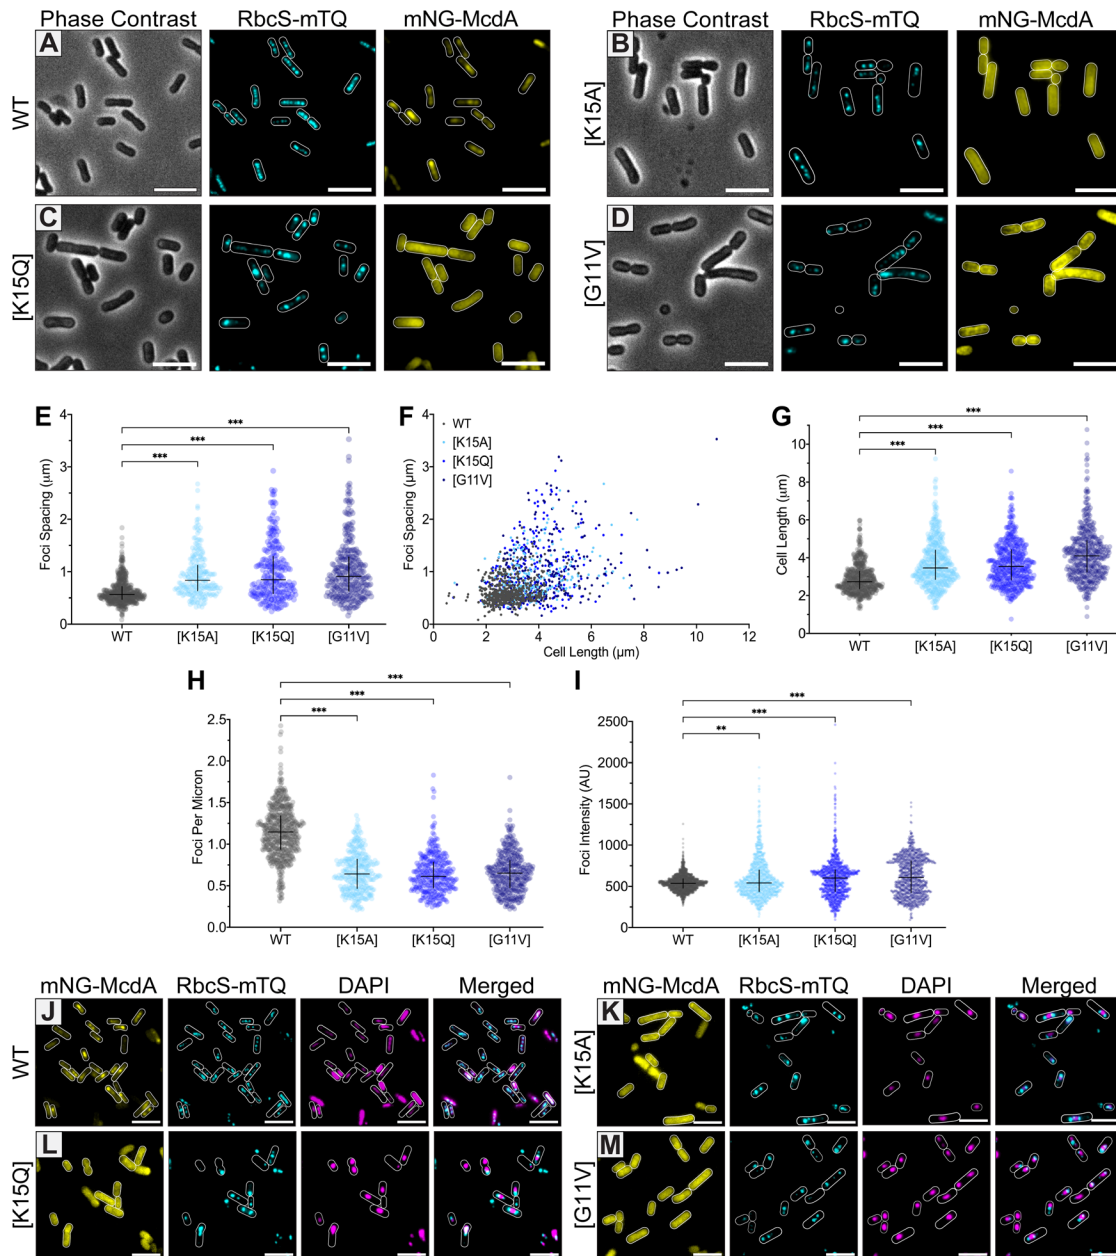

744  
 745 **Figure 2: McdA mutants deficient in ATP binding and dimerization are unable to interact with the**  
 746 **nucleoid and position carboxysomes.** (A) mNG-McdA dynamically oscillates and positions  
 747 carboxysomes labelled with RbcS-mTQ (cyan). (B-D) ATP-binding (K15A and K15Q) and dimerization  
 748 (G11V) mutants of mNG-McdA no longer oscillate and carboxysomes aggregate. Cell outlines in  
 749 fluorescent channels are based on the Phase Contrast image. (E) Spacing between carboxysome foci in  
 750 the same cell. (F) Distribution of spacing between carboxysome foci as a function of cell length. For (E)  
 751 and (F): WT  $n = 558$  cells;  $n > 200$  cells per mutant strain. (G) Cell lengths of specified strains.  $n > 400$   
 752 cells per strain. (H) Number of carboxysome foci per unit cell length for each strain. WT  $n = 578$  cells;  $n$   
 753  $> 300$  cells per mutant strain. (I) Carboxysome foci intensity for each cell strain (Arbitrary Units = AU).  
 754 WT  $n = 1925$  foci;  $n > 1100$  foci per mutant strain. Data represent median with interquartile range. \*\*\*  $p$   
 755  $< 0.001$ , \*\*  $p < 0.005$  by Kruskal-Wallis test. (J-M) Microscopy images of cells with ciprofloxacin-  
 756 compacted nucleoids. mNG-McdA and the specified variants (yellow), carboxysome foci (cyan) and  
 757 DAPI-stained nucleoids (magenta). Carboxysome and DAPI channels are merged. Scale bars: 5  $\mu\text{m}$ .

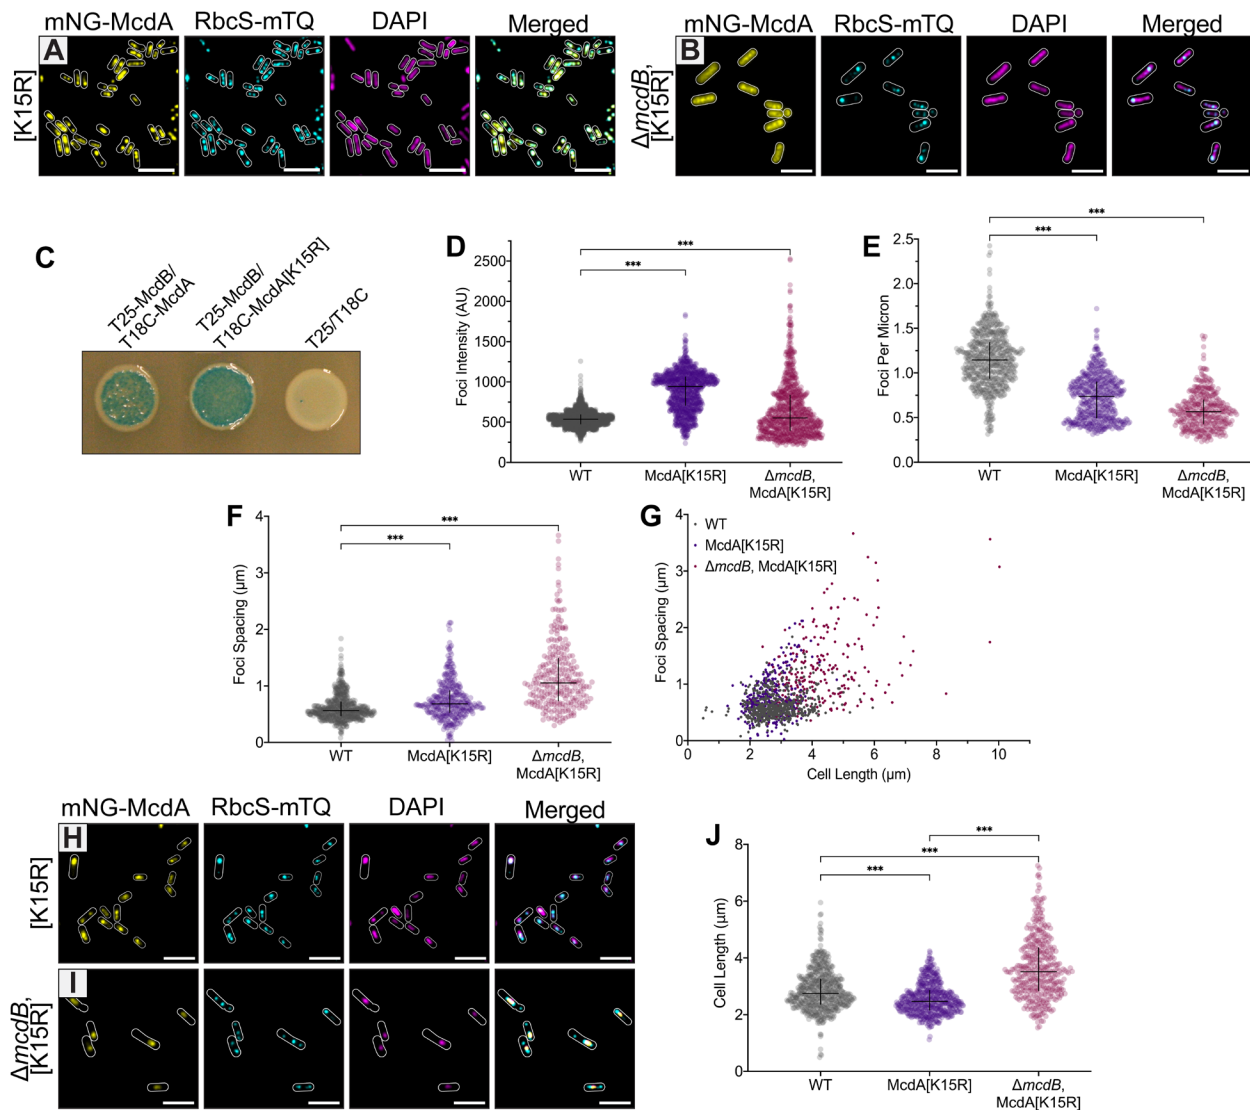

758  
759

**Figure 3: The ATP-Trap mutant McdA[K15R] irreversibly locks McdB-bound carboxysomes onto the nucleoid.** (A) Microscopy images of mNG-McdA[K15R] (yellow), RbcS-mTQ-labelled carboxysomes (cyan) and DAPI-stained nucleoid (magenta). Merged image overlays mNG-McdA[K15R] and RbcS-mTQ-labelled carboxysomes. (B) Microscopy images of mNG-McdA[K15R] in  $\Delta mcdB$  background strain. Merged image shows carboxysome and DAPI signals. (C) Bacterial two-hybrid interaction assay between the indicated protein pairs. Image is representative of three independent experiments. (D) Carboxysome foci intensity for specified cell strains. (Arbitrary Units = AU). WT  $n = 1925$  foci;  $n > 800$  foci per mutant strain. (E) Carboxysome foci number as a function of cell length. WT  $n = 578$  cells;  $n > 370$  cells of mutant strains. (F) Spacing of carboxysome foci. WT  $n = 558$  cells;  $n > 250$  cells of mutant strains. (G) Distribution of spacing between carboxysome foci as a function of cell length. WT  $n = 558$  cells;  $n > 380$  cells of mutant strains. (H) Microscopy images of mNG-McdA[K15R] (yellow), carboxysome foci (cyan) and DAPI-stained nucleoid (magenta) with ciprofloxacin treatment. Merged image shows carboxysome and DAPI signals. (I) Microscopy images of mNG-McdA[K15R] (yellow) in  $\Delta mcdB$  background strain, carboxysome foci (cyan) and DAPI-stained nucleoid (magenta) with ciprofloxacin treatment. Merged image overlays carboxysome, mNG-McdA[K15R] and DAPI. (J) Cell lengths of specified strains. WT  $n = 558$  cells;  $n > 250$  cells of mutant strains. Scale bars: 5  $\mu m$ .

|                                                    | Walker A | C-terminal Half                                      |
|----------------------------------------------------|----------|------------------------------------------------------|
| <i>Alkalinema</i> sp. CACIAM                       | SGGQGKT  | SVKGYGSLVRTLDLLQLQDVGATDAQVLGILPFRDRWIGNTQTQESR      |
| <i>Aphanothece hegewaldii</i> CCALA 016            | SGGQGKT  | STKGVNSFIRTLLELVQSLLENLGAFTGSILGVVPPFRDKWFGRSQSKDSA  |
| <i>Calothrix</i> sp. 336/3                         | SGGQGKT  | SVKGYGSLVRTLDLLSGLQDVGATNAQVLGVLPPFRDRWFGNTQAQESR    |
| <i>Cyanosarcina</i> cf. <i>burmensis</i> CCALA 770 | SGGQGKT  | TVKGFGLSVRTLDLLTNLKEVKATNAELLGVLPFRDRWIGMNSTESR      |
| <i>Fremyella diplosiphon</i> Fd33                  | SGGQGKT  | SVKGYGSLVRTLDLLSGLRDVGATNAEILGVLPFRDRWFGNTQAQESR     |
| <i>Leptolyngbya</i> sp. Heron Island J             | SGGQGKT  | NVKGVNSLVETLAFLEQADIEAFNGQVLGIVPFRDRWVGNTQTKESR      |
| <i>Nostoc calcicola</i> FACHB-389                  | SGGQGKT  | SVKGYGSLVRTLDLLSGLRDVGATNAQVLGVLPPFRDRWFGNTQAQESR    |
| <i>Nostoc minutum</i> NIES-26                      | SGGQGKT  | SVKGYGSLVRTLDLLSGLRDVGATNASILGVLPFRDRWFGNTQAQESR     |
| <i>Nostoc</i> sp. 213                              | SGGQGKT  | SSKGVNSLIRTLTSLVEELQEIDAFSGIVLGILPFRDKWVGNQVAQSK     |
| <i>Nostoc</i> sp. 5183                             | SGGQGKT  | SSKGVNSLIRTLTSLVEELQEIDAFSGIVLGILPFRDKWVGNQVAQSK     |
| <i>Nostoc</i> sp. ATCC 53789                       | SGGQGKT  | SSKGVNSLIRTLALIEELREIDAFSGEILGILPFRDKWVGNQVAQSK      |
| <i>Nostoc</i> sp. CENA543                          | SGGQGKT  | SVKGYGSLVRTLDLLSGLQDVGATNAQVLGVLPPFRDRWFGNTQAQESR    |
| <i>Nostoc</i> sp. KVJ20                            | SGGQGKT  | SSKGVNSLIRTLTSLVEELQEIDAFSGIVLGILPFRDKWVGNQVAQSK     |
| <i>Nostoc</i> sp. PCC 7524                         | SGGQGKT  | SVKGYGSLVRTFDLLNGLRDVGATDAEVLGVLPPFRDRWFGNTQAQESR    |
| <i>Phormidium tenue</i> NIES-30                    | SGGQGKT  | TVKGYGSLIRTAEAVERLEDGASDAKVLGVIPFRDRWVGRSRTKESD      |
| <i>Spirulina subsalsa</i>                          | SGGQGKT  | SLKGYGSLVRTLDLLKSMQNVRAQAVLGVIPFRDRWIGMNSTESR        |
| <i>Tolypothrix</i> sp. NIES-4075                   | SGGQGKT  | SVKGYGSLIRTLDLLNGLRDVGATDAEVLGVLPPFRDRWFGNTQAQESR    |
| <i>Synechococcus</i> sp. UTEX 2973                 | SGGQGKT  | SSKGLNSLLRRTLDLVAEMSEVEAFQGGILGILPFRDRWLGRGRTQAKQSQ  |
| <i>Synechococcus elongatus</i> UTEX3055            | SGGQGKT  | SSKGLNSLLRRTLDLVEEMTEVEAFQGGILGILPFRDRWLGRGRTQAKQSQ  |
| <i>Synechococcus elongatus</i> PCC 6301            | SGGQGKT  | SSKGLNSLLRRTLDLVAEMSEVEAFQGGILGILPFRDRWLGRGRTQAKQSQ  |
| <i>Synechococcus elongatus</i> PCC 11801           | SGGQGKT  | SSKGLNSLLRRTLDLVAEMSEVEAFQGGILGVLPPFRDRWLGRGRTQAKQSQ |
| <i>Cyanothece</i> sp. PCC 7424                     | SGGQGKT  | STKGVNSLIRTLLEIVQSLKLGAFSGILGVIPFRDKWFGLSQSKDSA      |
| <i>Synechococcus elongatus</i> PCC 7942            | SGGQGKT  | SSKGLNSLLRRTLDLVAEMSEVEAFQGGILGILPFRDRWLGRGRTQAKQSQ  |

McdA Signature Lysine

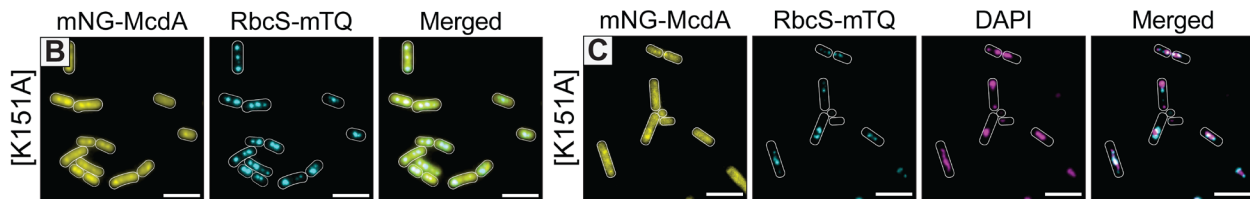

**Figure 4: McdA is a member of an unstudied subclass of ParA-type ATPase characterized by a different signature lysine position.** (A) Sequence alignment of McdA homologs possessing a serine residue in place of the signature lysine the Walker A box that co-occurs with an invariant lysine residue in the C-terminal half of proteins – the McdA signature lysine. (B) Microscopy images of mNG-McdA[K151A] and RbcS-mTQ-labelled carboxysomes (cyan). (C) Microscopy images of mNG-McdA[K151A] (yellow), carboxysome foci (cyan) and DAPI-stained nucleoid (magenta) with ciprofloxacin treatment. Merged image shows carboxysome and DAPI signals. Scale bars: 5  $\mu$ m.

776  
777  
778  
779  
780  
781  
782  
783  
784  
785  
786  
787  
788  
789  
790  
791  
792  
793  
794  
795  
796  
797  
798

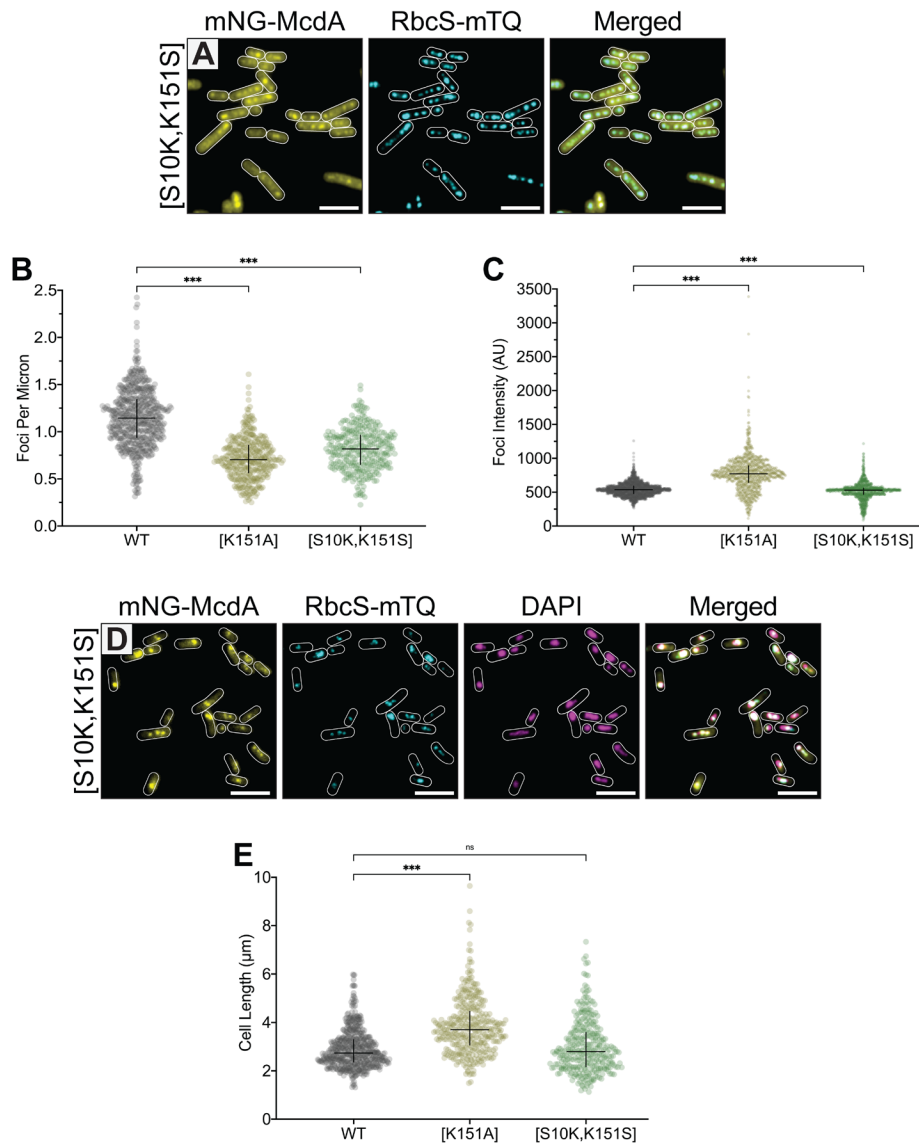

799  
800

801 **Figure 5: Carboxysomes are pseudo-positioned when the McdA signature lysine is moved into the**  
 802 **classical Walker A box position. (A)** Microscopy images of mNG-McdA[S10K, K151S] and RbcS-  
 803 mTQ-labelled carboxysomes (cyan). **(B)** Number of carboxysome foci per unit cell length. WT  $n = 578$   
 804 cells;  $n > 350$  cells of mutant strains. **(C)** Carboxysome foci intensity. (Arbitrary Units = AU). WT  $n =$   
 805 1925 foci;  $n > 950$  foci from mutant strains. **(D)** Microscopy images of mNG-McdA[S10K, K151S]  
 806 (yellow), carboxysome foci (cyan) and DAPI-stained nucleoid (magenta) with ciprofloxacin treatment.  
 807 Merged image overlays carboxysome, mNG-McdA[S10K, K151S] and DAPI signals. **(E)** Cell lengths of  
 808 specified strains. ns = not significant by Kruskal-Wallis test. WT  $n = 561$  cells;  $n > 320$  cells of mutant  
 809 strains. Scale bars: 5 µm.

810  
811  
812  
813  
814  
815

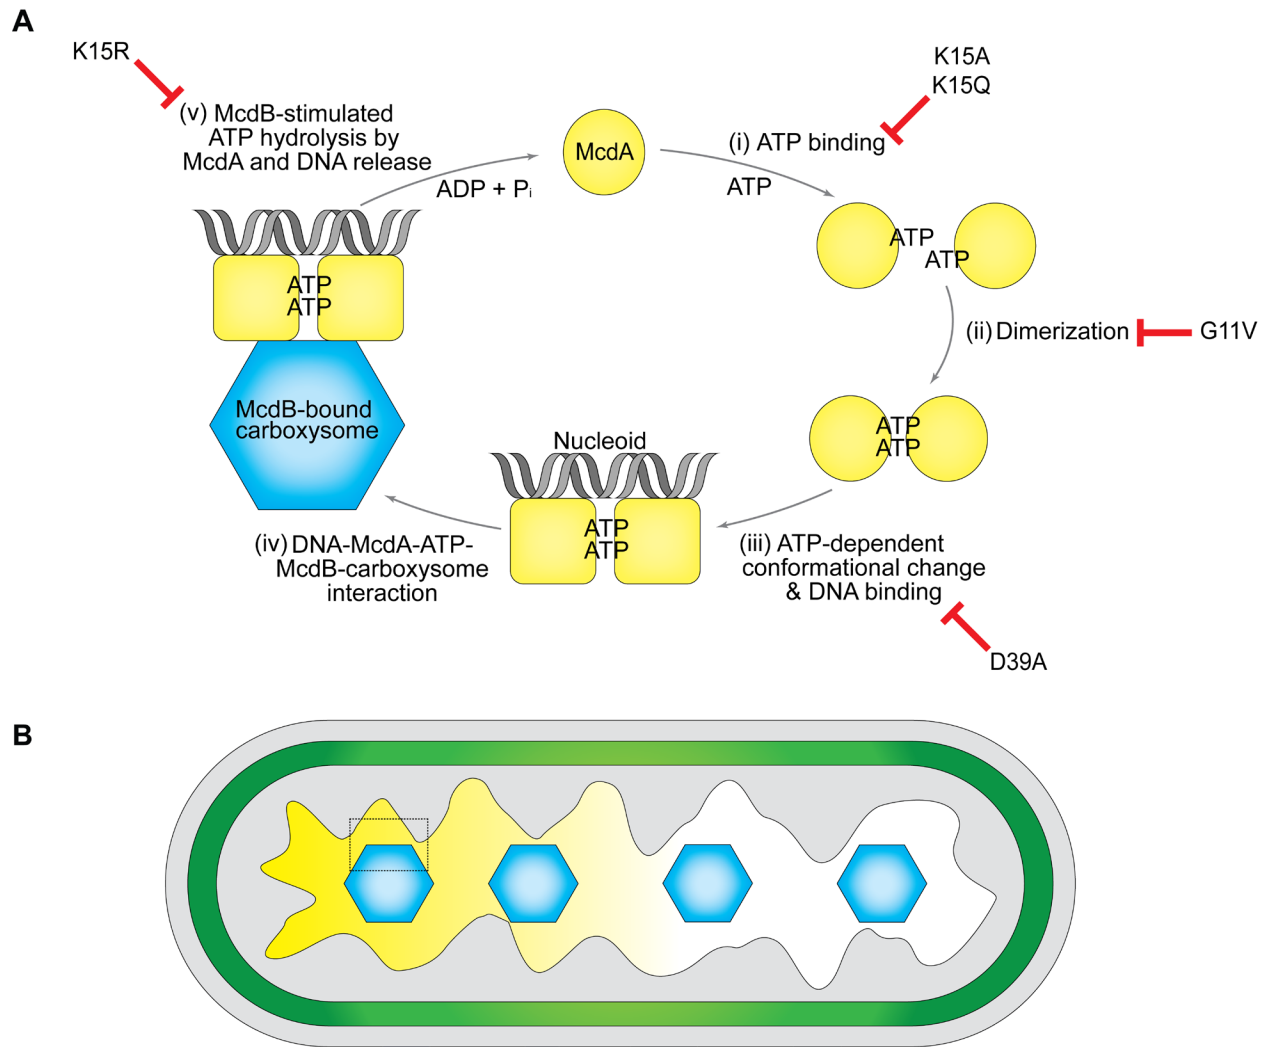

816  
817

**Figure 6: Model for ATP-cycling by McdA and associated functions in carboxysome positioning.**  
 (A) The ATPase cycle of McdA. Trap mutants of McdA identified in this study are indicated. (i) When unbound from ATP, McdA monomers are diffuse in the cytoplasm. (ii) Upon ATP-binding, McdA is competent for dimerization. (iii) ATP-bound McdA dimers must go through an ATP-dependent conformational change that licenses non-specific DNA binding to the nucleoid. (iv) McdB-bound carboxysomes are tethered via interactions with McdA-ATP dimers on the nucleoid. (v) McdB stimulates McdA ATPase activity and its release from the nucleoid in the vicinity of a carboxysome. (B) McdB-bound carboxysomes are uniformly distributed as they continually move toward higher concentrations of McdA on the nucleoid. The dashed box indicates the cellular region magnified in (A).

827  
828  
829  
830  
831  
832  
833  
834

## **Supplemental Information**

### **Dissection of the ATPase active site of McdA reveals the sequential steps essential for carboxysome distribution**

Pusparanee Hakim<sup>1</sup> and Anthony G. Vecchiarelli<sup>1\*</sup>

**\*Corresponding Author Email Address:** [ave@umich.edu](mailto:ave@umich.edu)

#### **This File Contains:**

- Supplemental Figures S1 to S4
- Supplemental Movie Legend S1
- Supplemental Tables S1 and S2

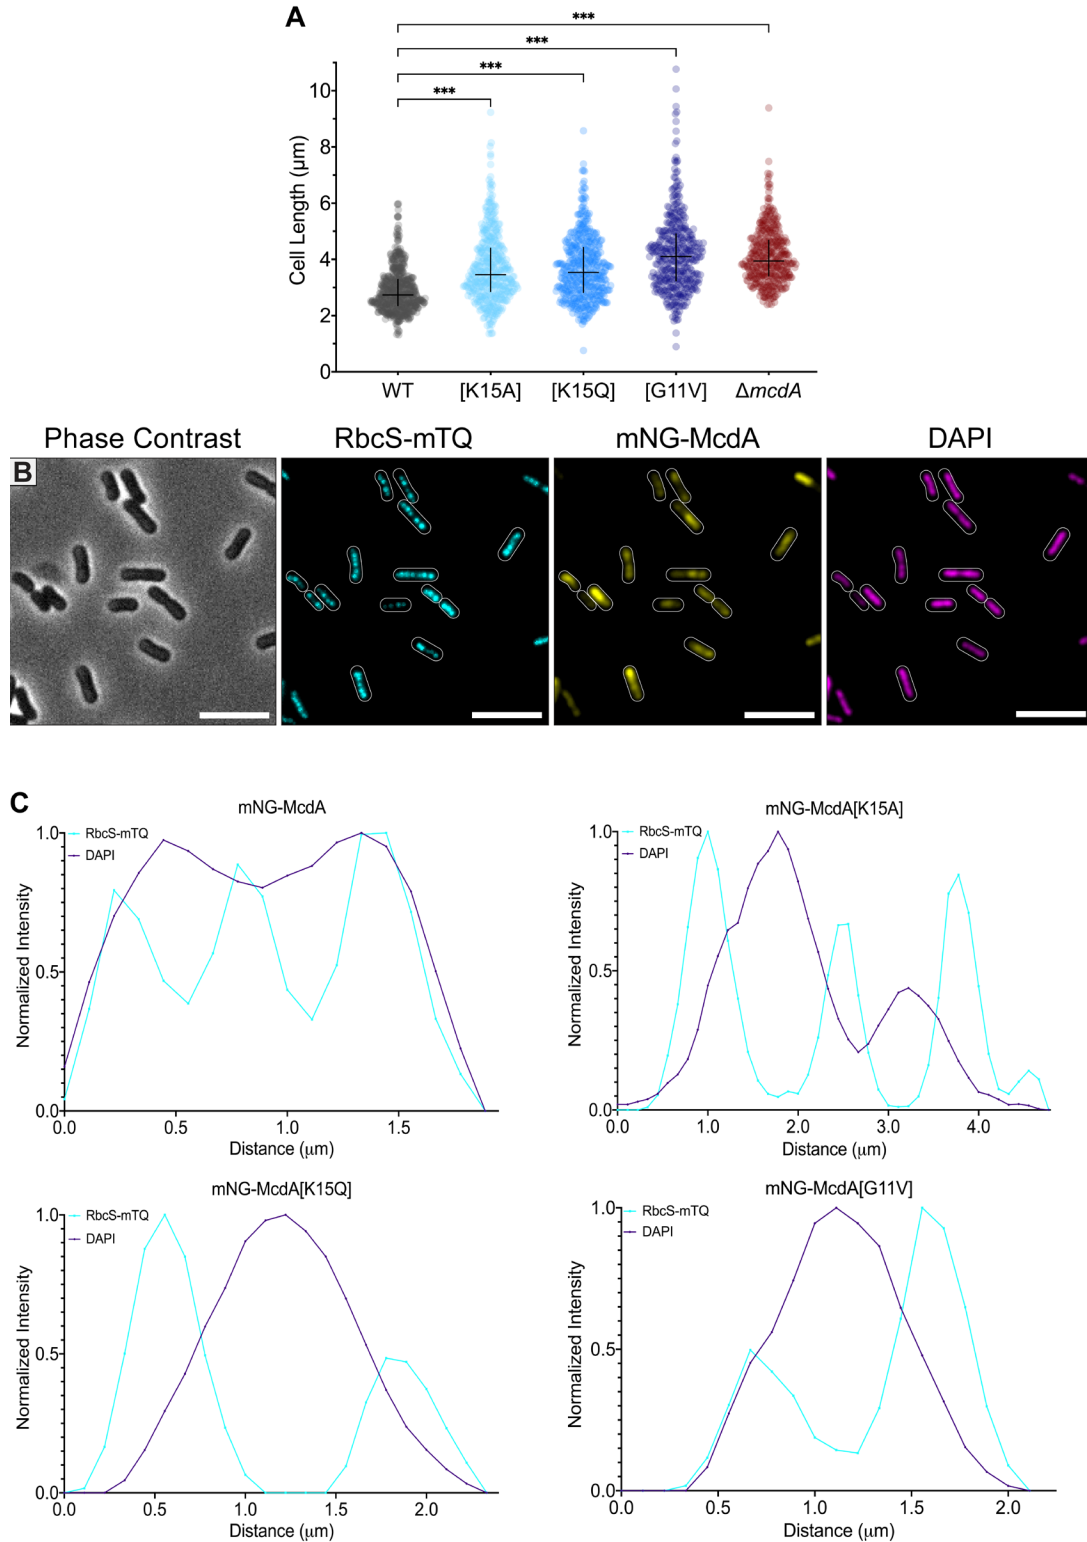

835

836 **Figure S1:** (A) Comparison of cell lengths among WT and specified mNG-McdA mutants and  $\Delta\text{mcdA}$   
837 strains. WT  $n = 558$  cells;  $n > 380$  cells per mutant strains. (B) Microscopy images of mNG-McdA cells  
838 (Figure 2A) with DAPI-stained nucleoid (magenta). (C) Line scans of carboxysome and nucleoid signals  
839 of specified strains. Each line scan graph is a representative signal measurement of cells from each strain.



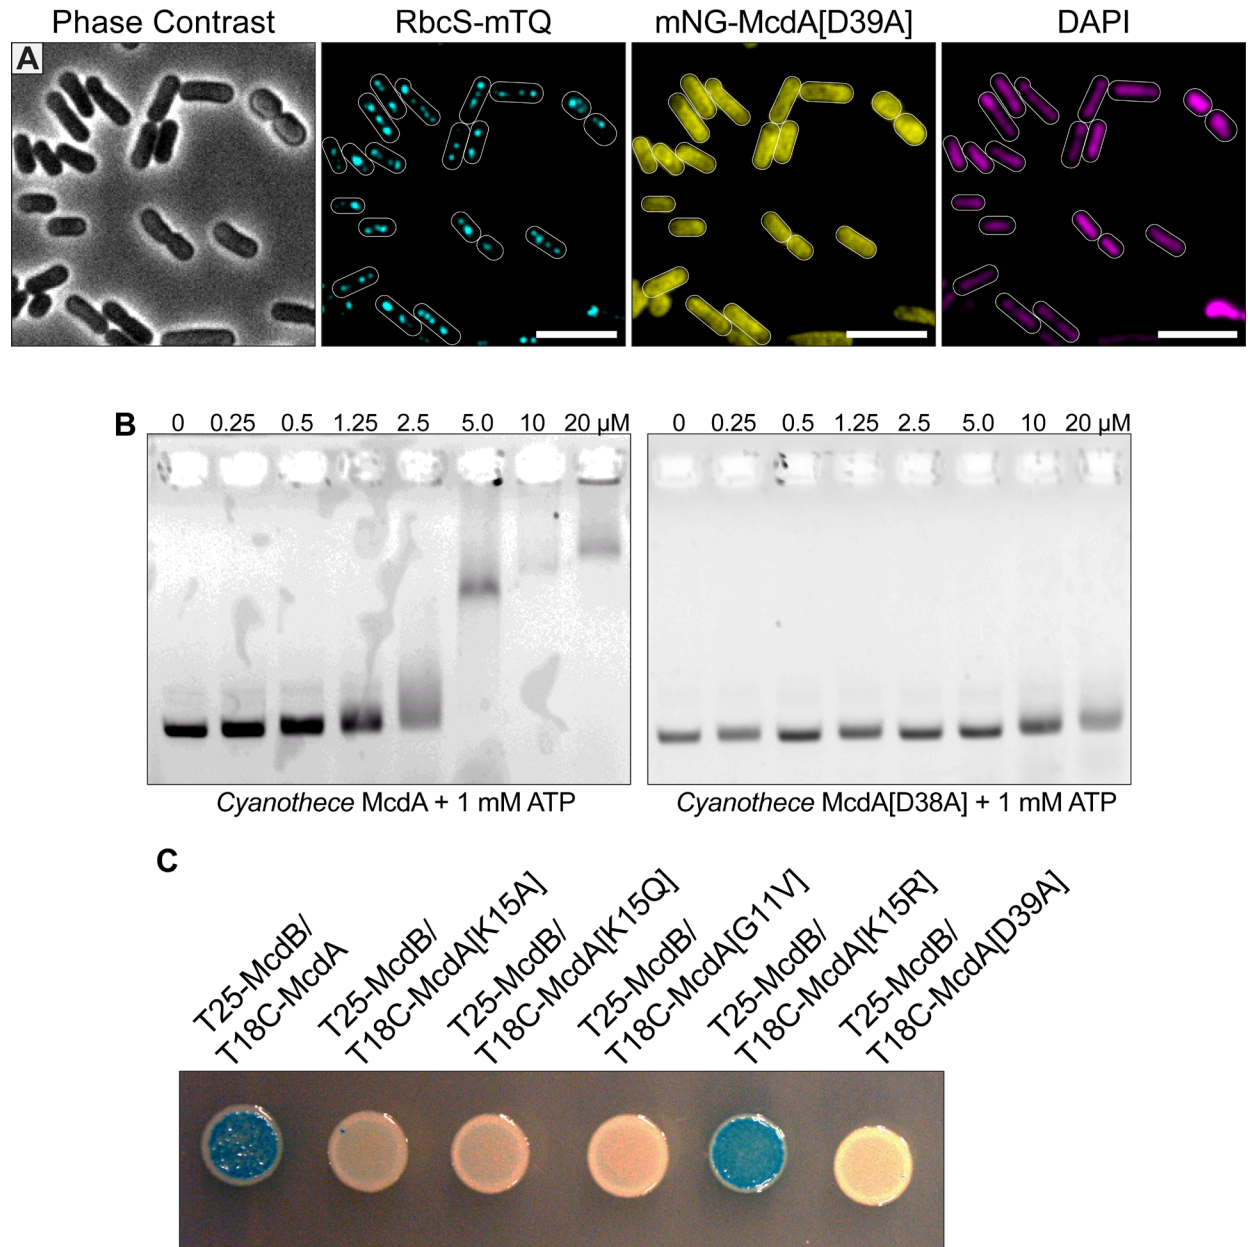

840

841 **Figure S2:** (A) Microscopy images of mNG-McdA[D39A] strain. (B) Bacterial two-hybrid interaction  
842 assay of McdB against the wild-type McdA or the specified mutants. Image is representative of three  
843 independent experiments. (C) Electrophoretic Mobility Shift Assay (EMSA) showing that wildtype  
844 *Ct*McdA binds and slows the migration of a non-specific plasmid DNA substrate in the presence of 1 mM  
845 ATP while *Ct*McdA[D38A] does not.

846

847

848

849

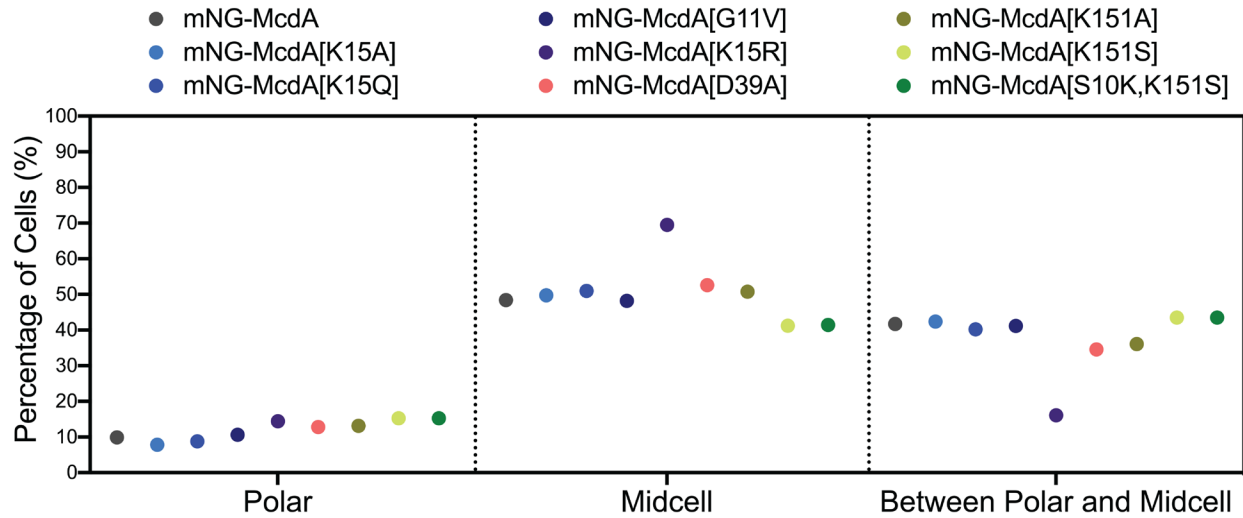

850

851

852 **Figure S3:** Binned subcellular localization of carboxysomes in the specified cell strains. Quantification  
853 was performed in MicrobeJ where carboxysome signals located within the region extending from the tip  
854 of the cell pole to a position on the medial axis located half the width away from the cell pole tip, are  
855 considered as “polar” localized. Carboxysome signals located within the region extending from the cell  
856 center to a position on the medial axis located half the width away from the cell center, are considered as  
857 “midcell” localized. Carboxysomes located between these two defined regions were grouped as “between  
858 polar and midcell”. The McdA[K15R] cell population significantly deviates from all other McdA variants  
859 in regard to carboxysome foci positioning in the cell. WT  $n = 1000$  foci;  $n > 800$  foci per mutant strain.

860

861

862

863

864

865

866

867

868

869

870

871

872

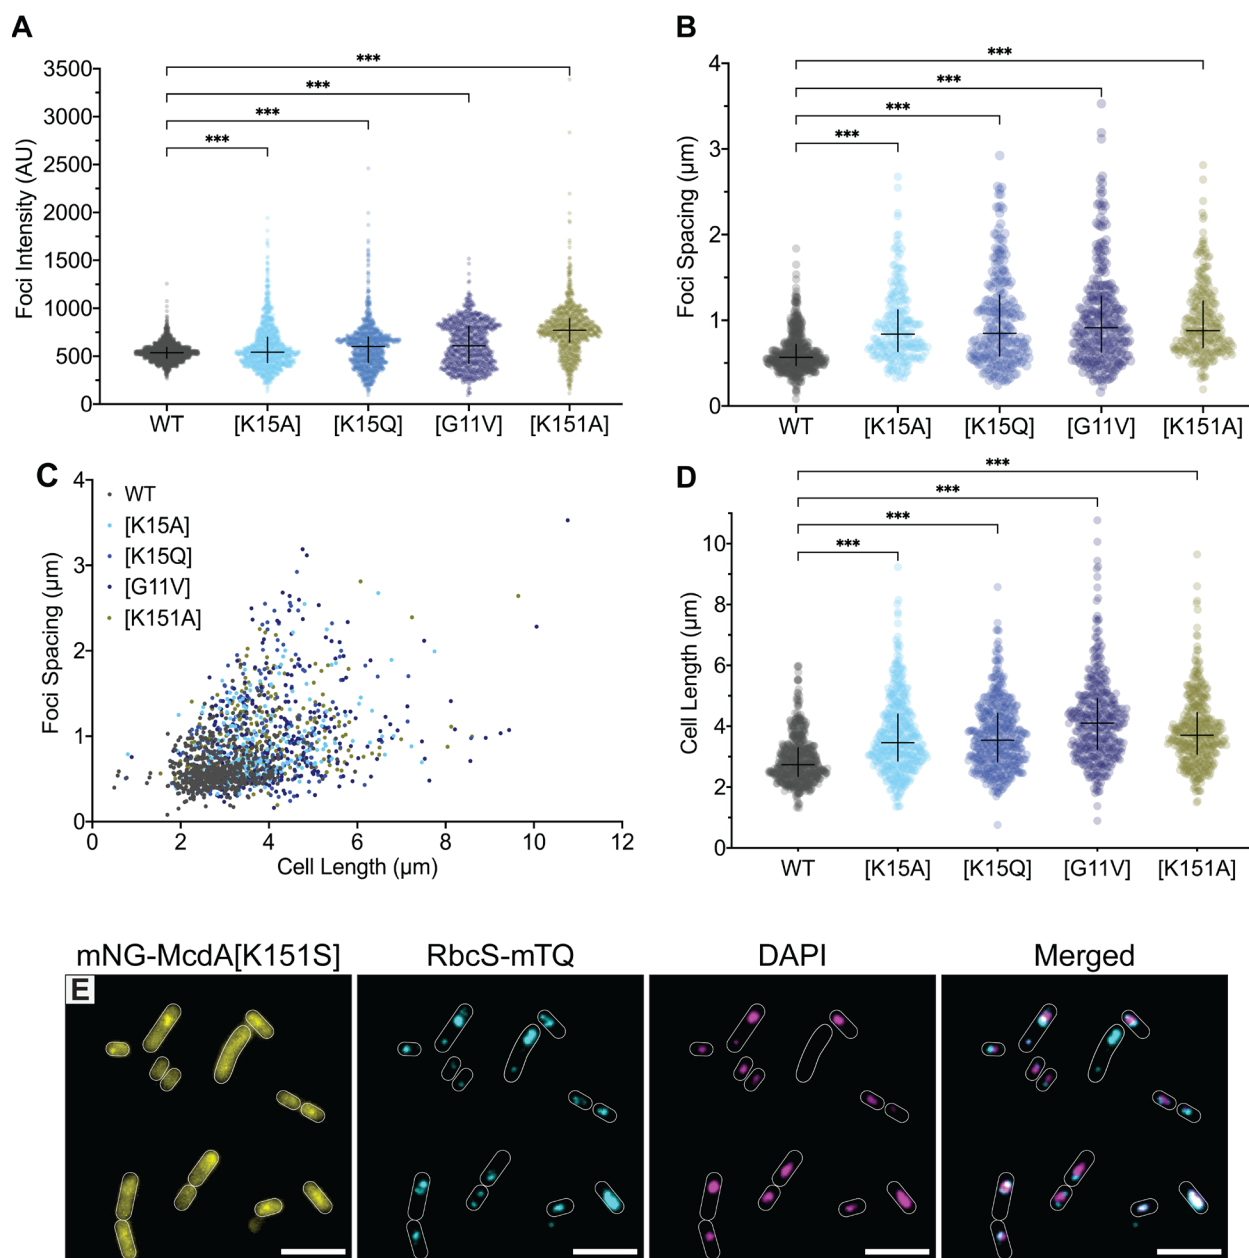

873

874 **Figure S4: (A)** Comparison of carboxysome foci intensity for specified strains. (Arbitrary Units = AU).  
 875 WT  $n = 1925$  foci;  $n > 1000$  foci per mutant strain. **(B)** Comparison of carboxysome foci spacing of  
 876 specified cell strains. **(C)** Distribution of carboxysome spacing as a function of cell length in the specified  
 877 strains. For **(B)** and **(C)**: WT  $n = 558$  cells;  $n > 220$  cells per mutant strain. **(D)** Comparison between the  
 878 cell length of specified mNG-McdA mutants cell strains. WT  $n = 561$  cells;  $n > 365$  cells per mutant  
 879 strain. **(E)** Microscopy images of mNG-McdA[K151S] (yellow), carboxysome foci (cyan) and DAPI-  
 880 stained nucleoid (magenta) when treated with ciprofloxacin. Merged image shows carboxysome and  
 881 DAPI signals.

882

883

884 **SUPPLEMENTARY MOVIE LEGEND**

885 **Movie S1:** Live-cell fluorescence microscopy of wildtype *S. elongatus* cells (3 representative cells)  
 886 treated with ciprofloxacin. mNG-McdA (yellow) continues to oscillate on ciprofloxacin-compacted  
 887 nucleoids (DAPI) and carboxysomes (cyan) are still distributed across the compacted nucleoid. Movie  
 888 was taken at 30 seconds per frame. Playback at 11 fps (330x real-time).

889

890

891 **SUPPLEMENTARY TABLES**

| Residue                | Mutations                       | ParA ATPase                | Phenotype                                                                                         | References                                                                                        |
|------------------------|---------------------------------|----------------------------|---------------------------------------------------------------------------------------------------|---------------------------------------------------------------------------------------------------|
| Signature<br>Lysine    | K to A                          | MipZ                       | ATP-binding deficient; Unable to interact with FtsZ; minicell formation                           | Corrales-Guerrero <i>et al.</i> 2020                                                              |
|                        |                                 | MinD                       | ATP and lipid-binding deficient, Unable to activate MinC                                          | Zhou <i>et al.</i> 2005                                                                           |
|                        |                                 | FlhG                       | ATP-hydrolysis deficient; Decreased cellular motility                                             | Ono <i>et al.</i> 2015                                                                            |
|                        |                                 | MxParA                     | Dimerization deficient; Unable to bind DNA                                                        | Lin <i>et al.</i> 2017                                                                            |
| Invariant<br>Glycine   | G to V                          | Soj                        | ATP-binding proficient; Dimerization-deficient                                                    | Leonard <i>et al.</i> 2005                                                                        |
|                        |                                 | MipZ                       | ATP-binding proficient; Dimerization-deficient; Minicell formation                                | Kiekebusch <i>et al.</i> 2012                                                                     |
|                        |                                 | PomZ                       | ATP-binding proficient; Dimerization-deficient; Cells defective in division                       | Schumacher <i>et al.</i> 2017                                                                     |
|                        |                                 | ParC                       | ATP-binding proficient; Impaired interaction with ParP and CheA                                   | Ringgaard <i>et al.</i> 2011                                                                      |
|                        |                                 | CcParA                     | ATP-binding proficient; dimerization deficient                                                    | Ptacin <i>et al.</i> 2010; 2014                                                                   |
|                        |                                 | MxParA                     | Dimerization deficient; Unable to bind DNA                                                        | Lin <i>et al.</i> 2017                                                                            |
|                        | K to A                          | PpfA                       | Impaired binding to TlpT and DNA                                                                  | Roberts <i>et al.</i> 2012                                                                        |
|                        |                                 | Soj                        | ATP-binding deficient                                                                             | Leonard <i>et al.</i> 2005                                                                        |
| Catalytic<br>Lysine    | K to Q                          | MipZ                       | ATP-binding deficient; Minicell formation                                                         | Kiekebusch <i>et al.</i> 2012                                                                     |
|                        |                                 | PomZ                       | ATP-binding deficient; Cells defective in division                                                | Schumacher <i>et al.</i> 2017                                                                     |
|                        |                                 | ParC                       | ATP-binding deficient; Impaired interaction with ParP and CheA                                    | Ringgaard <i>et al.</i> 2014                                                                      |
|                        |                                 | CcParA                     | ATP-binding deficient                                                                             | Ptacin <i>et al.</i> 2010; 2014                                                                   |
|                        | K to R                          | SopA                       | Does not oscillate <i>in vivo</i> ; No SopB-stimulated increase of ATPase activity                | Hatano <i>et al.</i> 2007; Libante <i>et al.</i> 2001                                             |
|                        |                                 | P1 ParA                    | ATP-binding, dimerization and DNA-binding proficient; ATP-hydrolysis deficient                    | Fung <i>et al.</i> 2001; Hwang & Vecchiarelli <i>et al.</i> 2013; Vecchiarelli <i>et al.</i> 2013 |
|                        | K to R                          | MxParA                     | ATP-binding, dimerization and DNA-binding proficient; ATP-hydrolysis deficient                    | Lin <i>et al.</i> 2017                                                                            |
|                        |                                 | SopA                       | Does not oscillate <i>in vivo</i> ; Reduced ATPase activity                                       | Hatano <i>et al.</i> 2007; Libante <i>et al.</i> 2001                                             |
|                        |                                 | CcParA                     | Incomplete chromosome segregated; Minicells formation                                             | Toro <i>et al.</i> 2008                                                                           |
| Catalytic<br>Aspartate | D to A                          | Soj                        | ATP-binding, dimerization and DNA-binding proficient; ATP-hydrolysis deficient                    | Leonard <i>et al.</i> 2005                                                                        |
|                        |                                 | MipZ                       | ATP-binding, dimerization and DNA-binding proficient; ATP-hydrolysis deficient; filamentous cells | Thanbichler & Shapiro 2006; Kiekebusch <i>et al.</i> 2012; Corrales-Guerrero <i>et al.</i> 2020   |
|                        |                                 | MinD                       | ATP-binding, dimerization and DNA-binding proficient; ATP-hydrolysis deficient                    | Park <i>et al.</i> 2012                                                                           |
|                        |                                 | PomZ                       | ATP-binding, dimerization and DNA-binding proficient; ATP-hydrolysis deficient                    | Treuner-Lange <i>et al.</i> 2013; Schumacher <i>et al.</i> 2017                                   |
|                        |                                 | FlhG                       | ATP-binding proficient; ATP-hydrolysis deficient                                                  | Ono <i>et al.</i> 2015; Schuhmacher <i>et al.</i> 2015                                            |
|                        |                                 | CcParA                     | ATP-binding, dimerization and DNA-binding proficient; ATP-hydrolysis deficient                    | Ptacin <i>et al.</i> 2010; 2014                                                                   |
|                        |                                 | MxParA                     | ATP-binding, dimerization and DNA-binding proficient; ATP-hydrolysis deficient                    | Lin <i>et al.</i> 2017                                                                            |
| PpfA                   | Trapped in ATP-TlpT-DNA complex | Roberts <i>et al.</i> 2012 |                                                                                                   |                                                                                                   |

892

893 **Table S1:** Detailed summary of ATP-binding pocket mutations studied in ParA family members and their  
 894 associated phenotypes; Cc: *Caulobacter crescentus*, Mx: *Myxococcus xanthus*.

895

896

897

898

899

900

| Strain Name | Description/Genotype                      | Source                         |
|-------------|-------------------------------------------|--------------------------------|
| JSM-206     | mNG-McdA + RbcS-mTQ                       | MacCready <i>et al.</i> , 2018 |
| AH-5        | mNG-McdA[K15A] + RbcS-mTQ                 | This study                     |
| AH-6        | mNG-McdA[K15Q] + RbcS-mTQ                 | This study                     |
| AH-7        | mNG-McdA[G11V] + RbcS-mTQ                 | This study                     |
| AH-8        | mNG-McdA[D39A] + RbcS-mTQ                 | This study                     |
| AH-9        | mNG-McdA[K15R] + RbcS-mTQ                 | This study                     |
| AH-10       | mNG-McdA[K151A] + RbcS-mTQ                | This study                     |
| AH-11       | mNG-McdA[K151S] + RbcS-mTQ                | This study                     |
| AH-12       | mNG-McdA[S10K,K151S] + RbcS-mTQ           | This study                     |
| AH-13       | $\Delta mcdB$ + mNG-McdA[K15R] + RbcS-mTQ | This study                     |
| RR-1        | $\Delta mcdA$ + RbcS-mTQ                  | Rillema <i>et al.</i> , 2020   |

901 **Table S2.** Cyanobacterial strains used in this study.
